# Supplementary material for: Total synthesis of dendrobate alkaloid (+)-241D, isosolenopsin and isosolenopsin A: application of a gold-catalyzed cyclization
Source: Royal Society of Chemistry journal article supplement (doi:10.1039/c2ob25685a), 2012-01-01

# **Total synthesis of dendrobate alkaloid (+)-241D, isosolenopsin and isosolenopsin A: application of a gold-catalyzed cyclization**

**Nicolas Gouault,\* Myriam Le Roch, Gisele de Campos Pinto and Michèle  
David**

Equipe PNSCM, UMR 6226, Université de Rennes 1, 2 avenue du Pr Léon Bernard, 35043  
Rennes, France.

Fax: (33)2 23 23 44 25 ; Tel: (33)2 23 23 48 25; E-mail: [nicolas.gouault@univ-rennes1.fr](mailto:nicolas.gouault@univ-rennes1.fr)

**$^1\text{H}$  &  $^{13}\text{C}$  NMR Data**

**(37 Pages)**

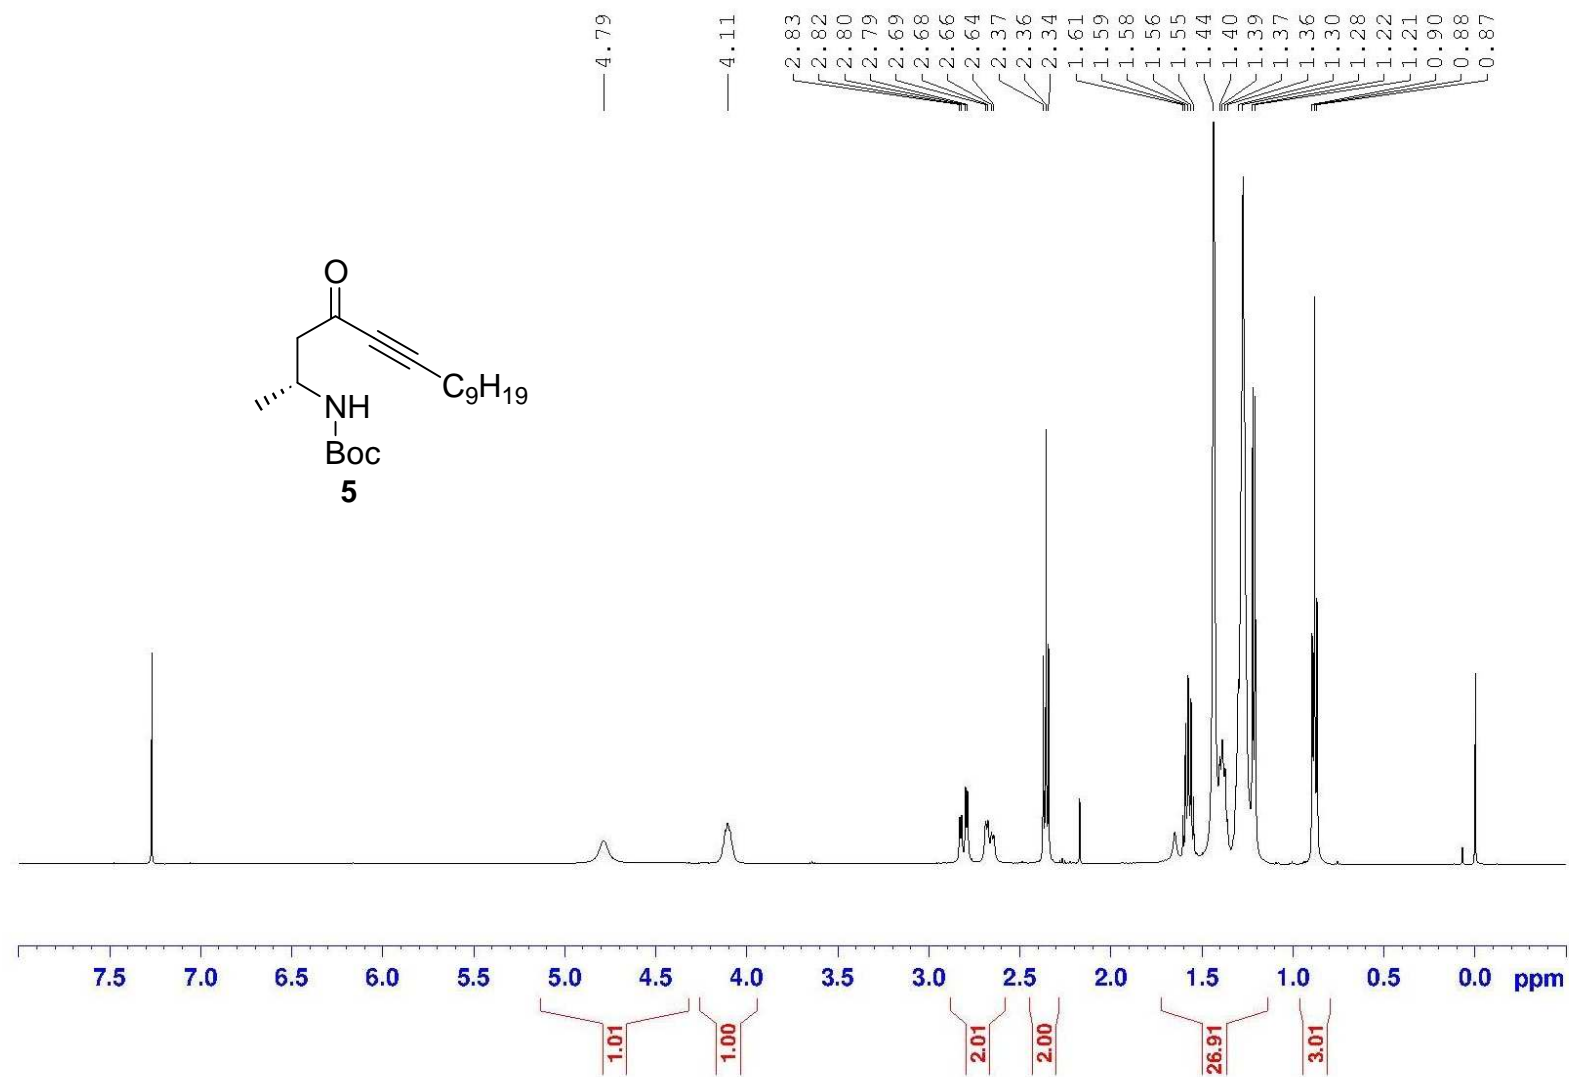

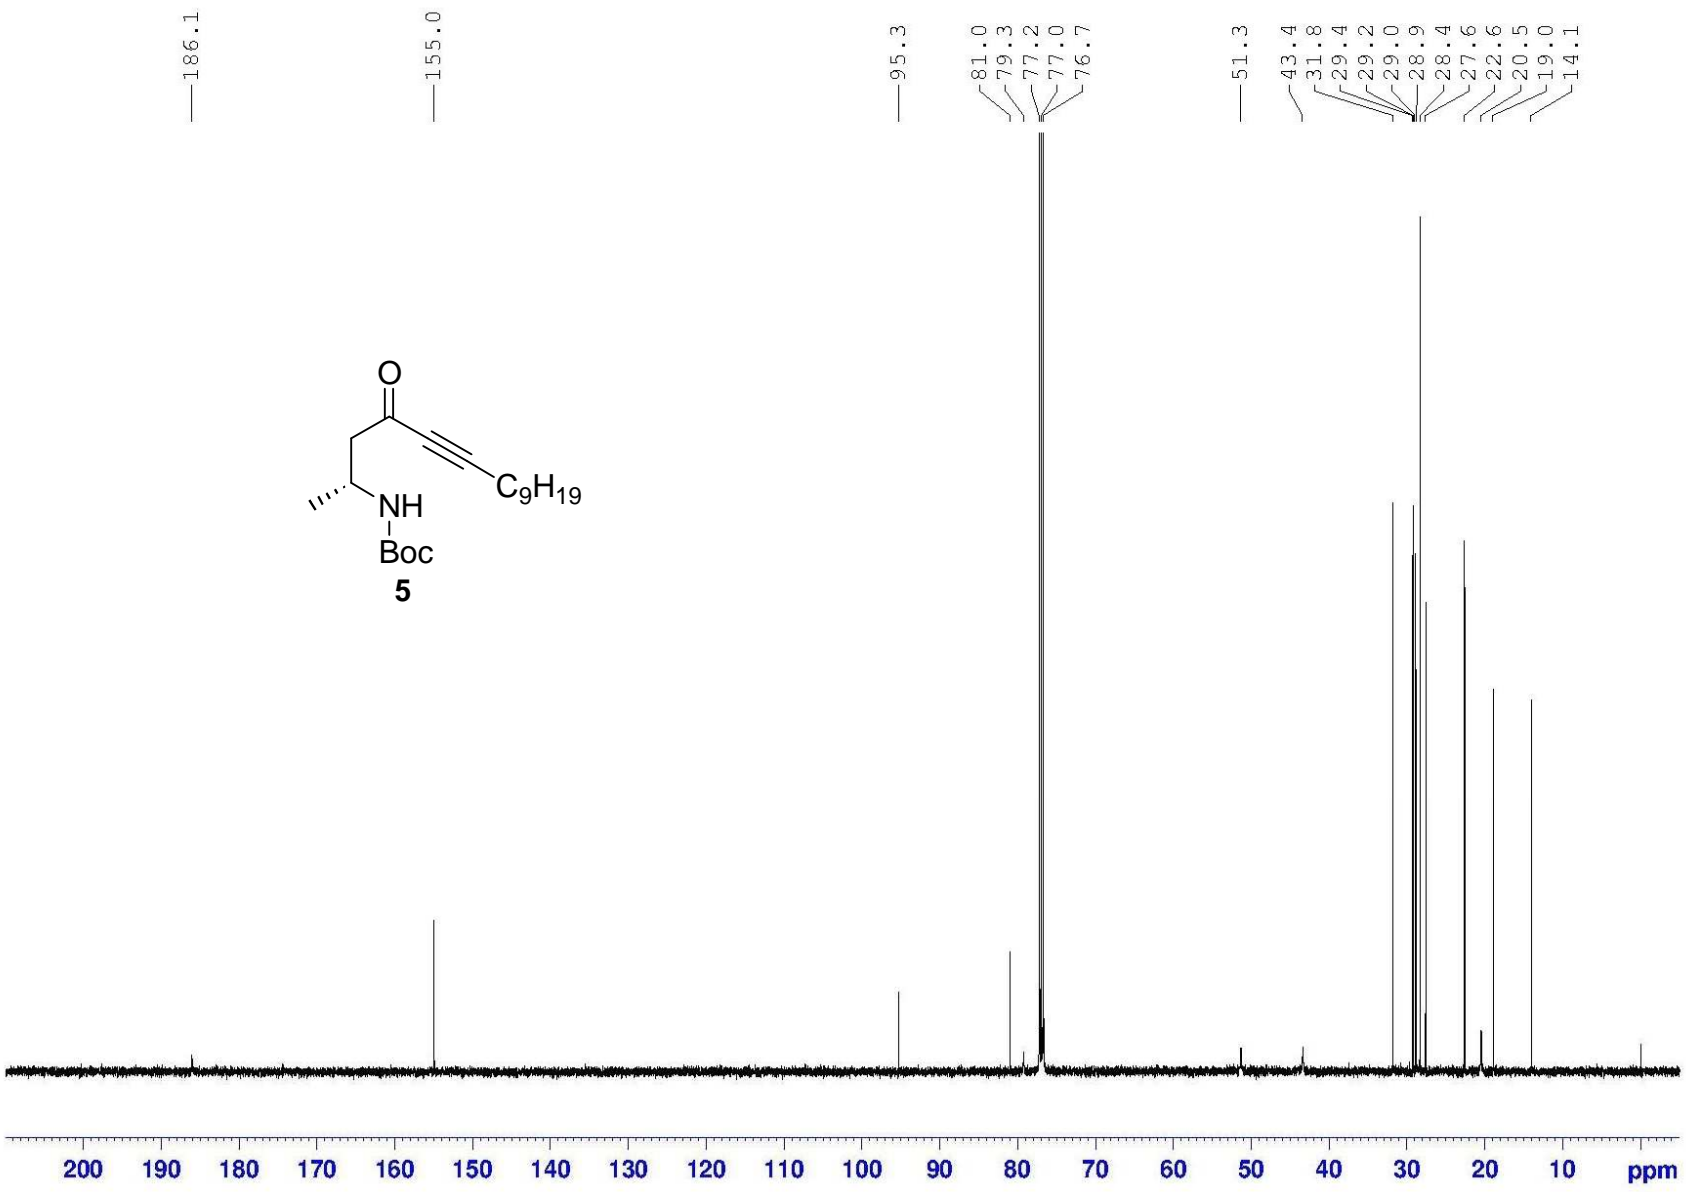

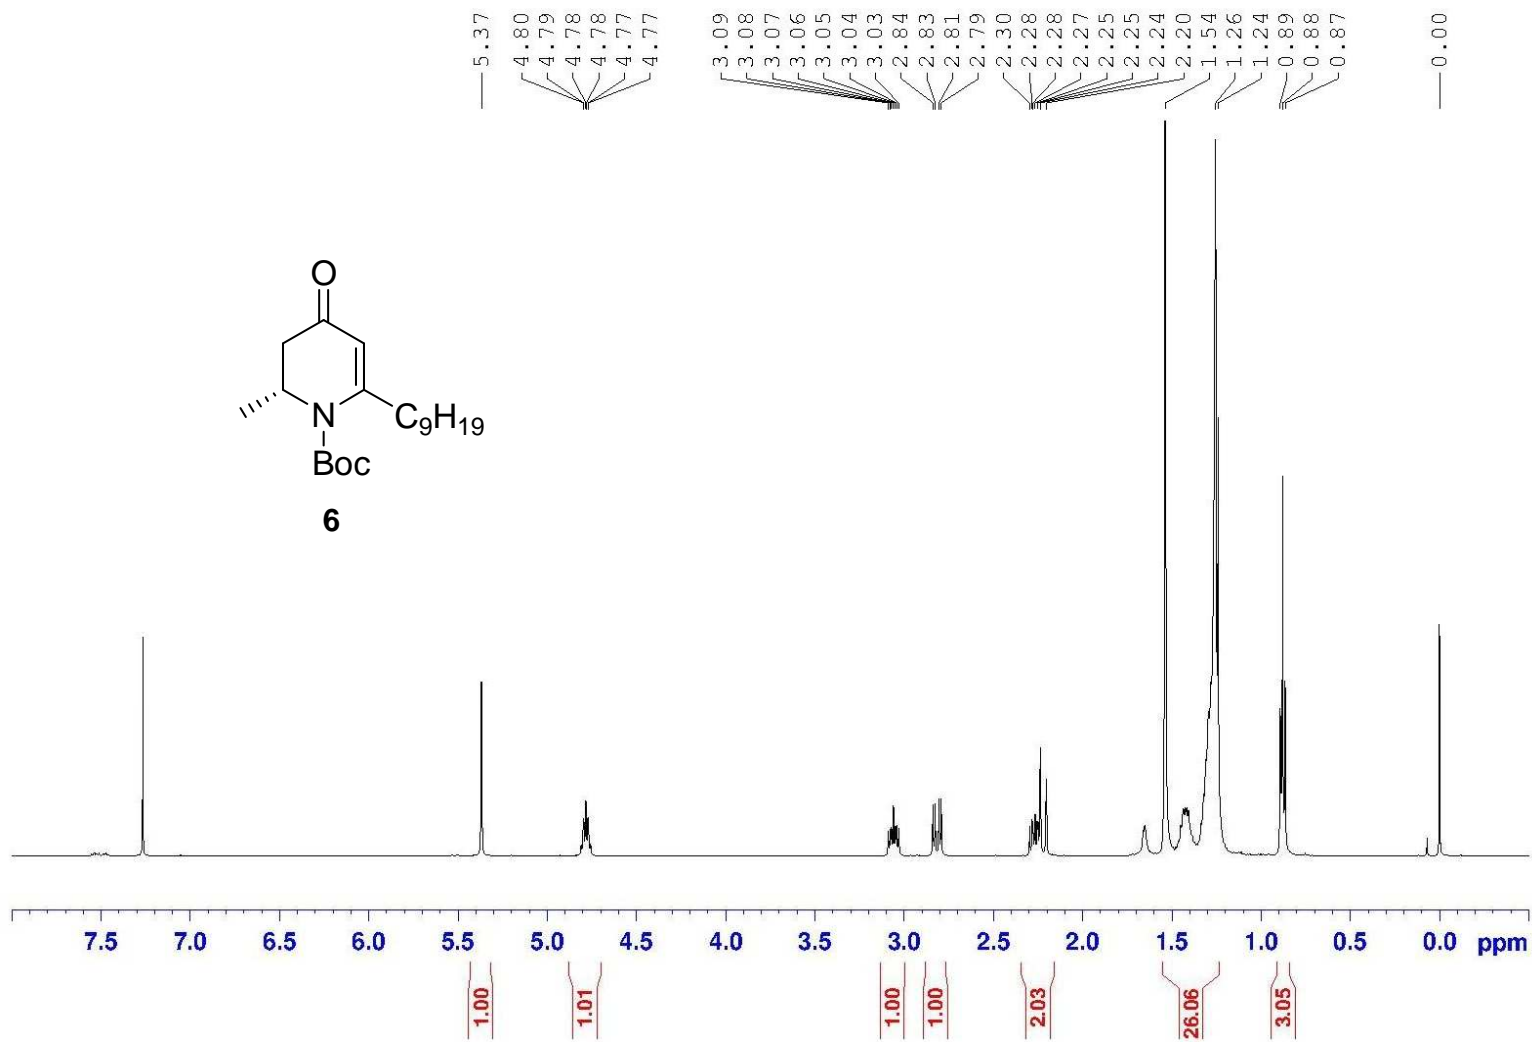

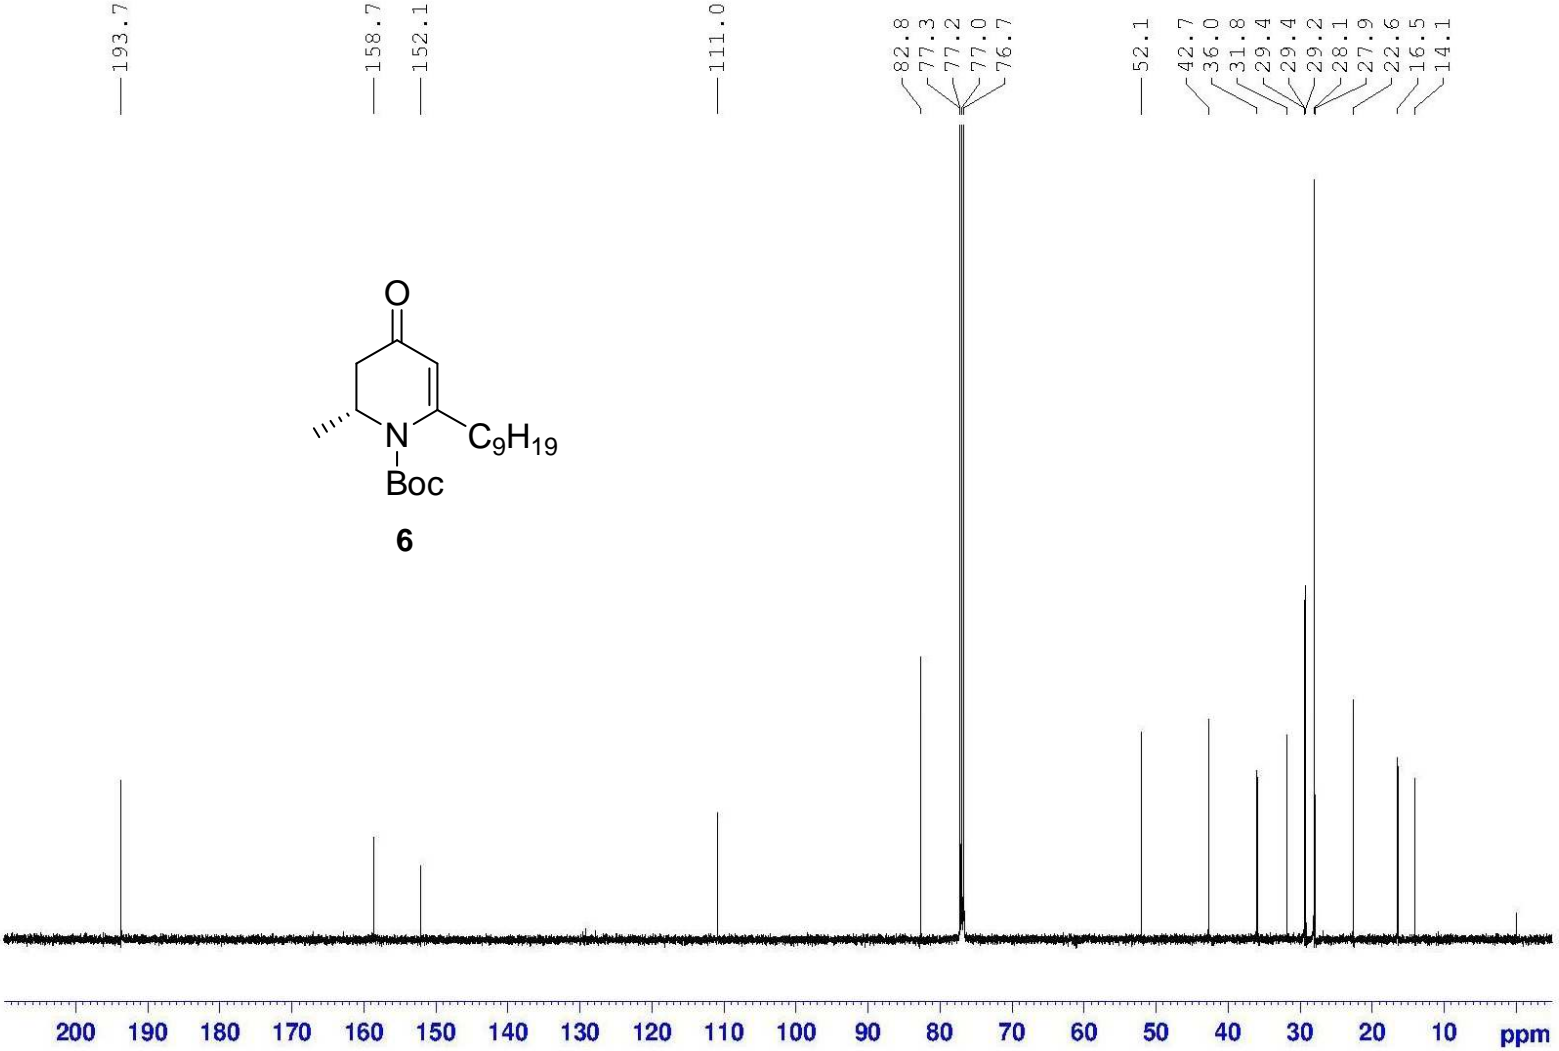

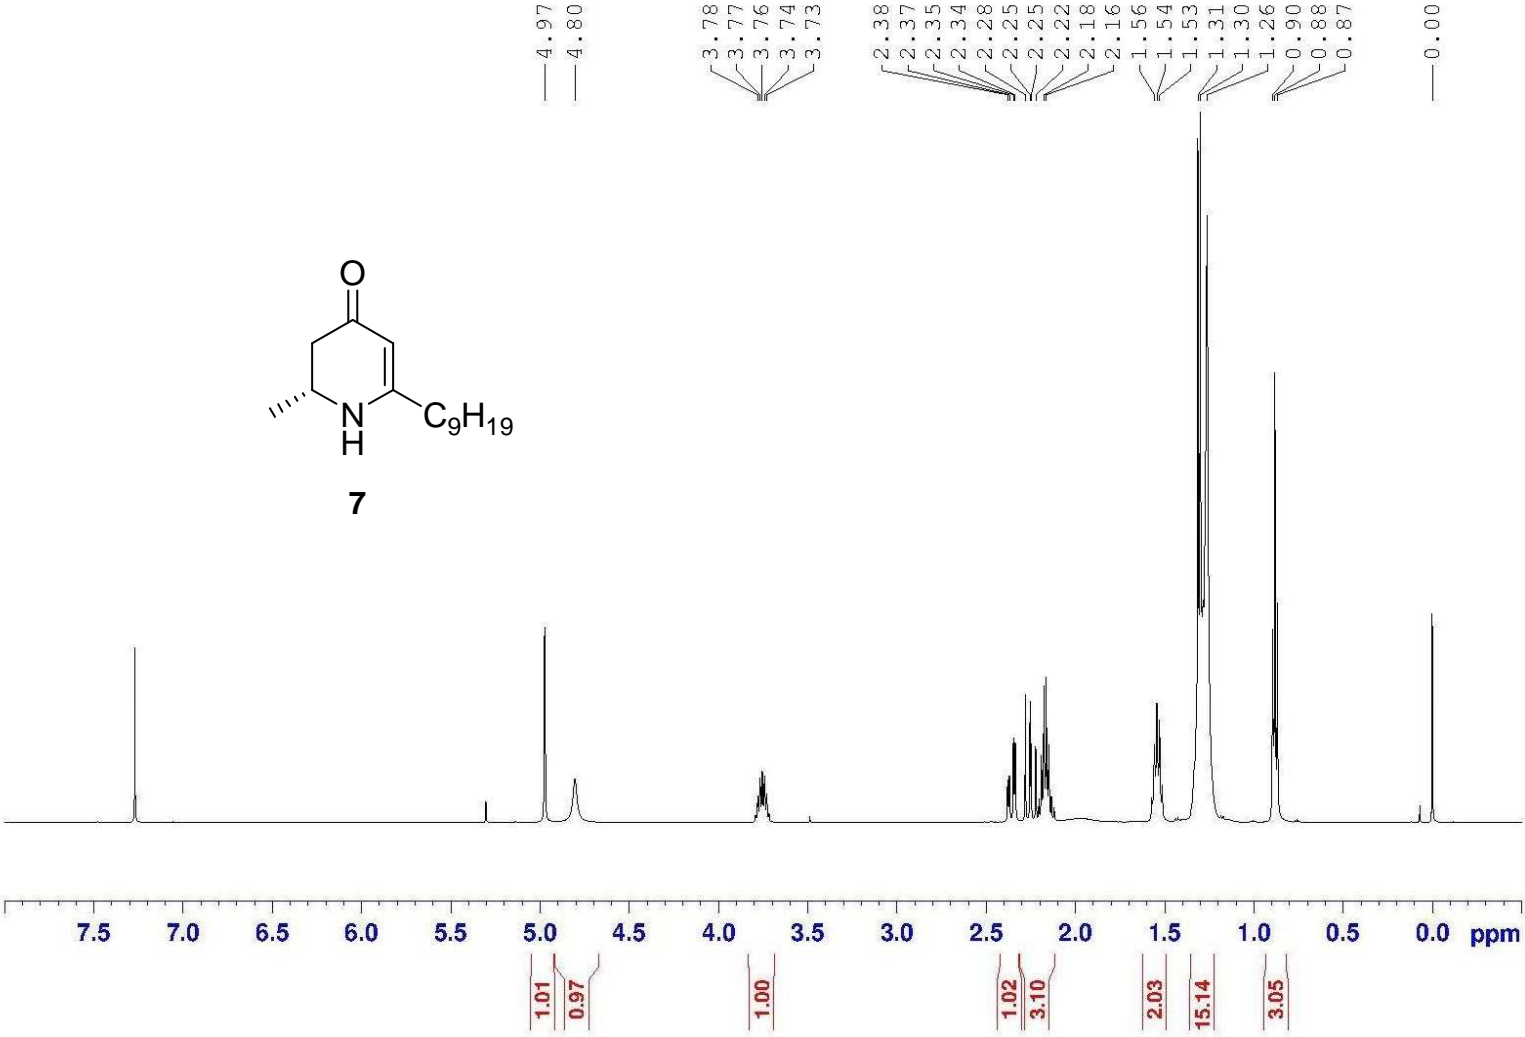

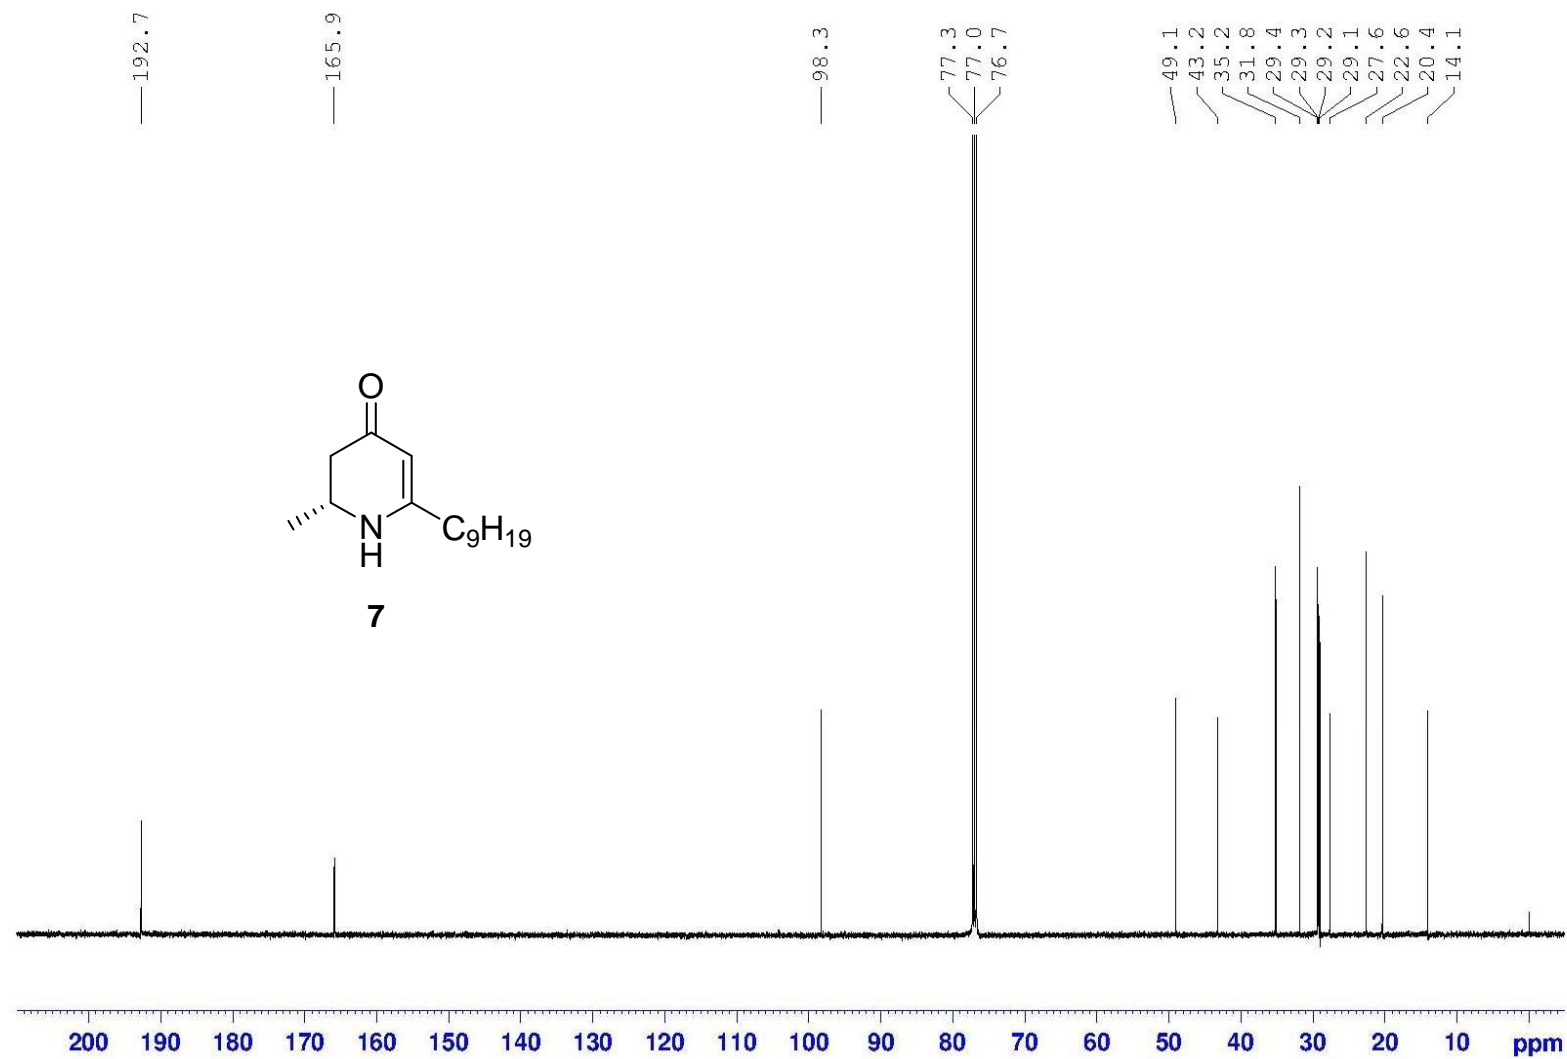

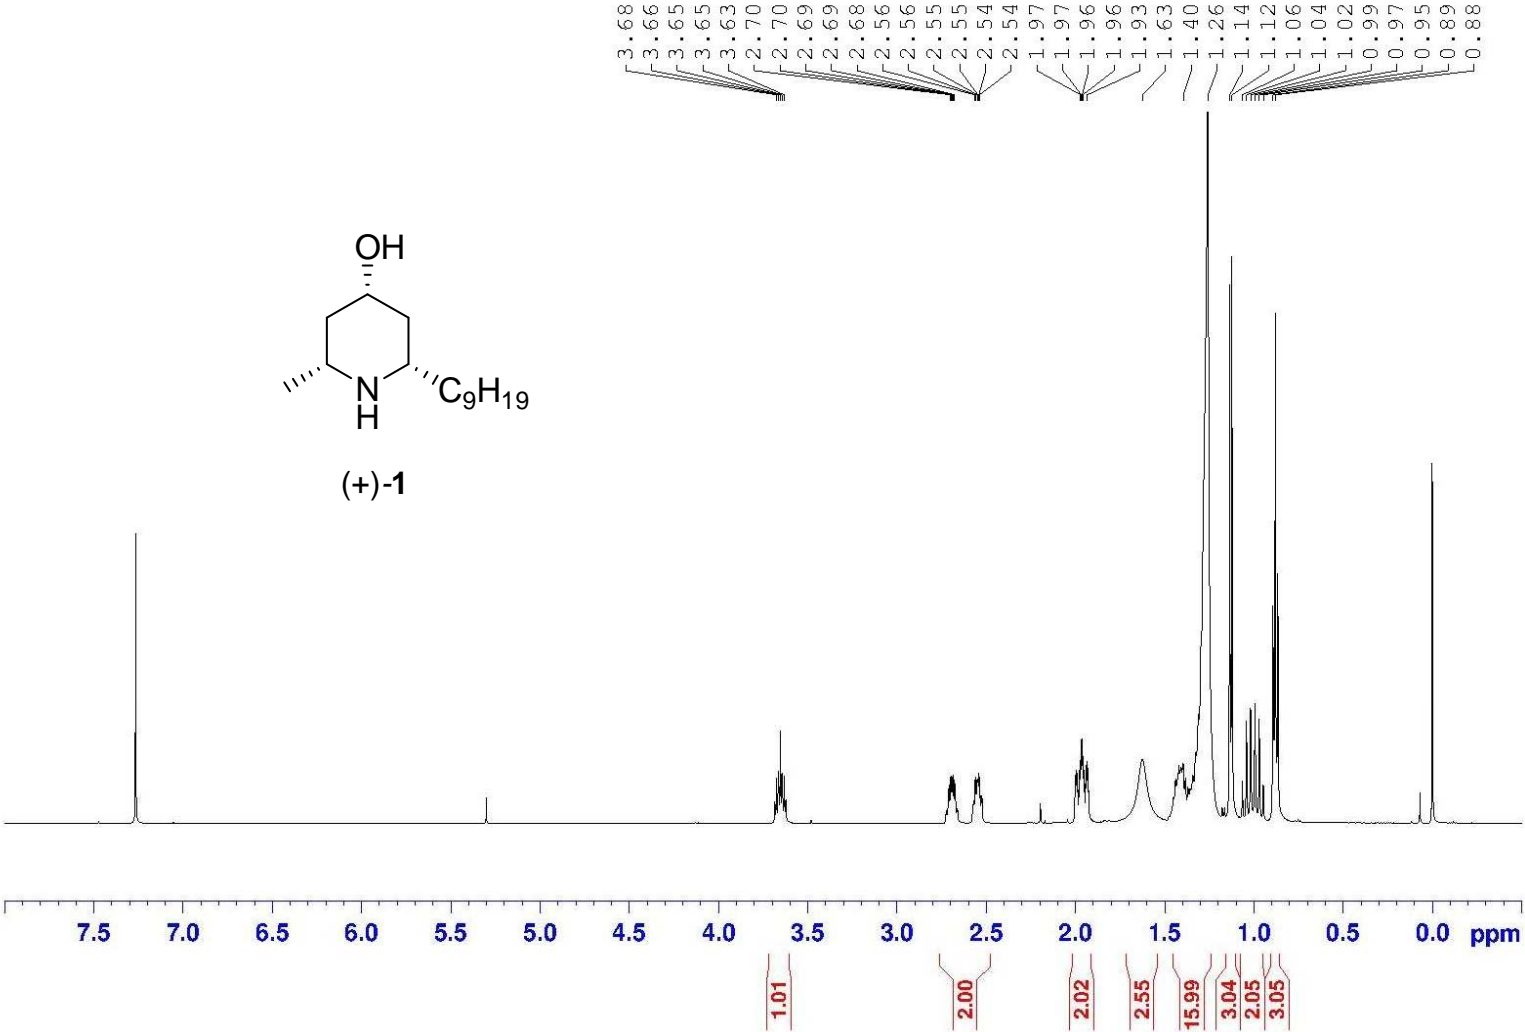

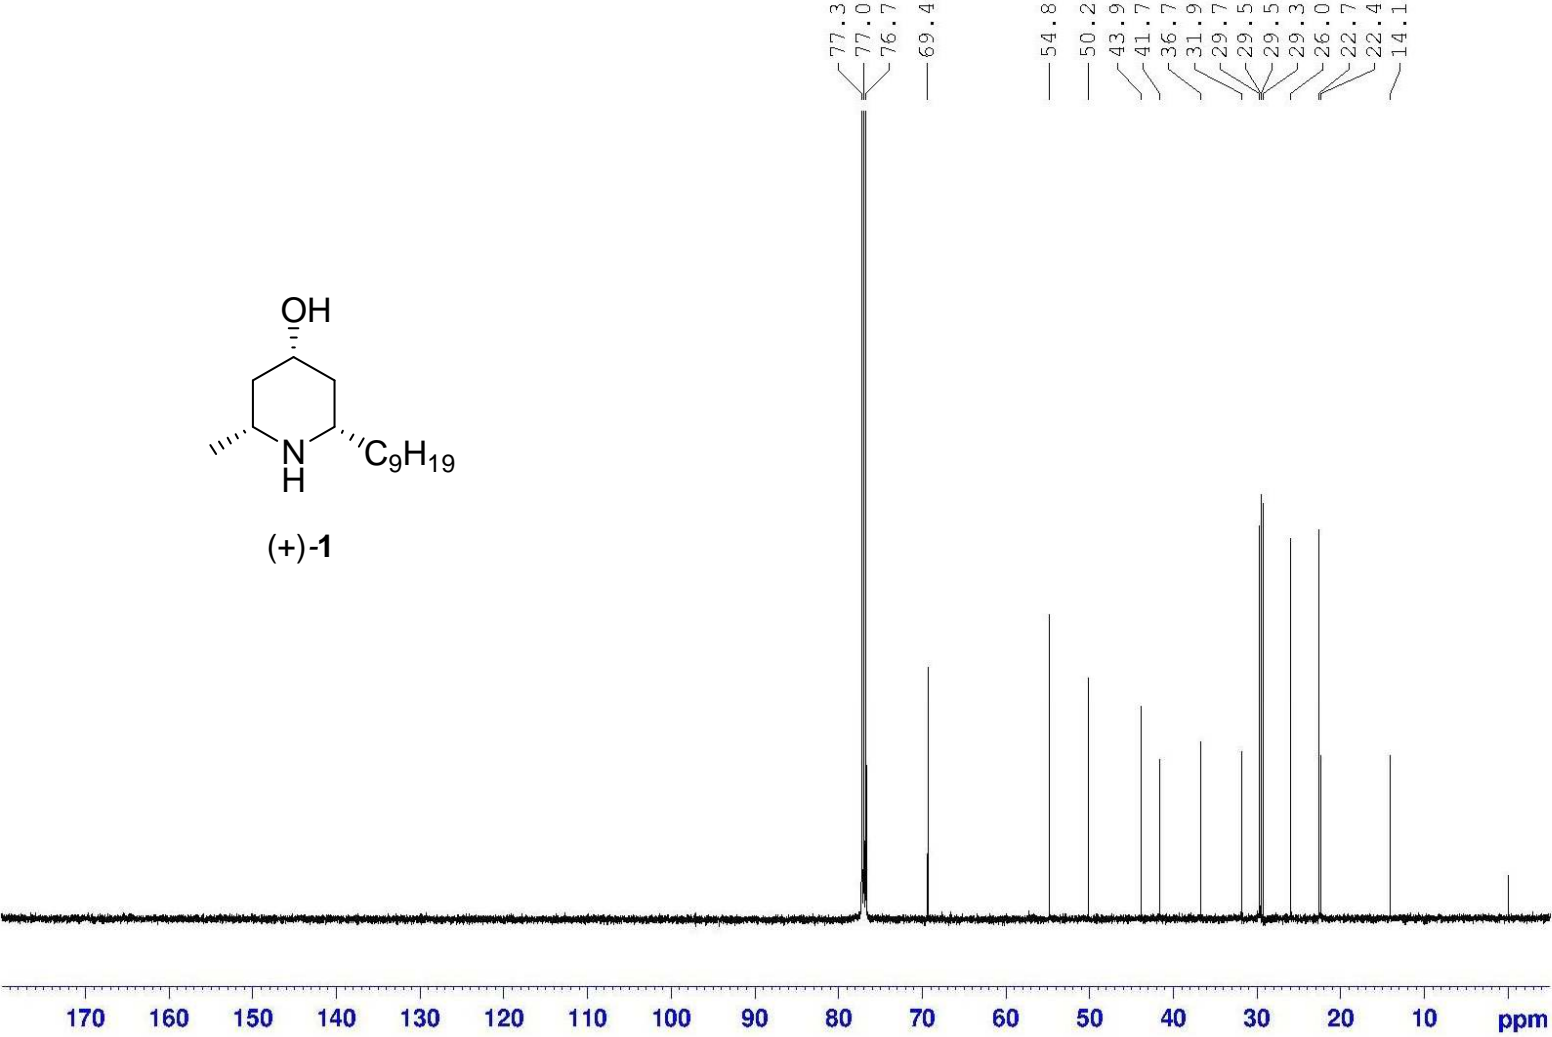

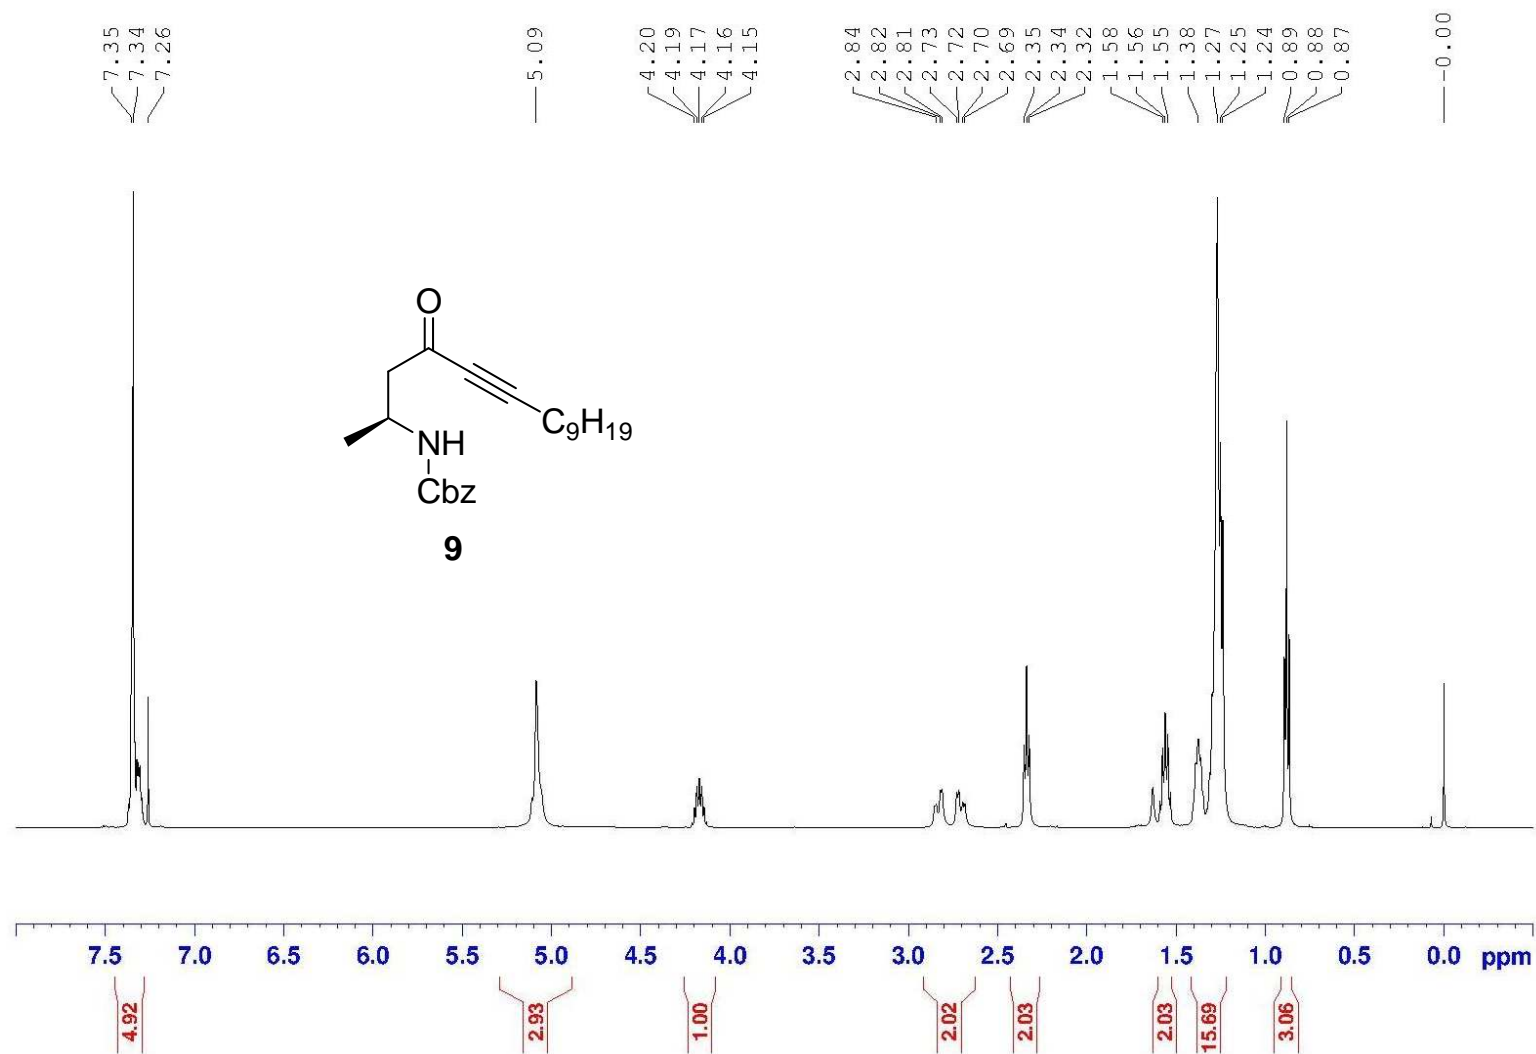

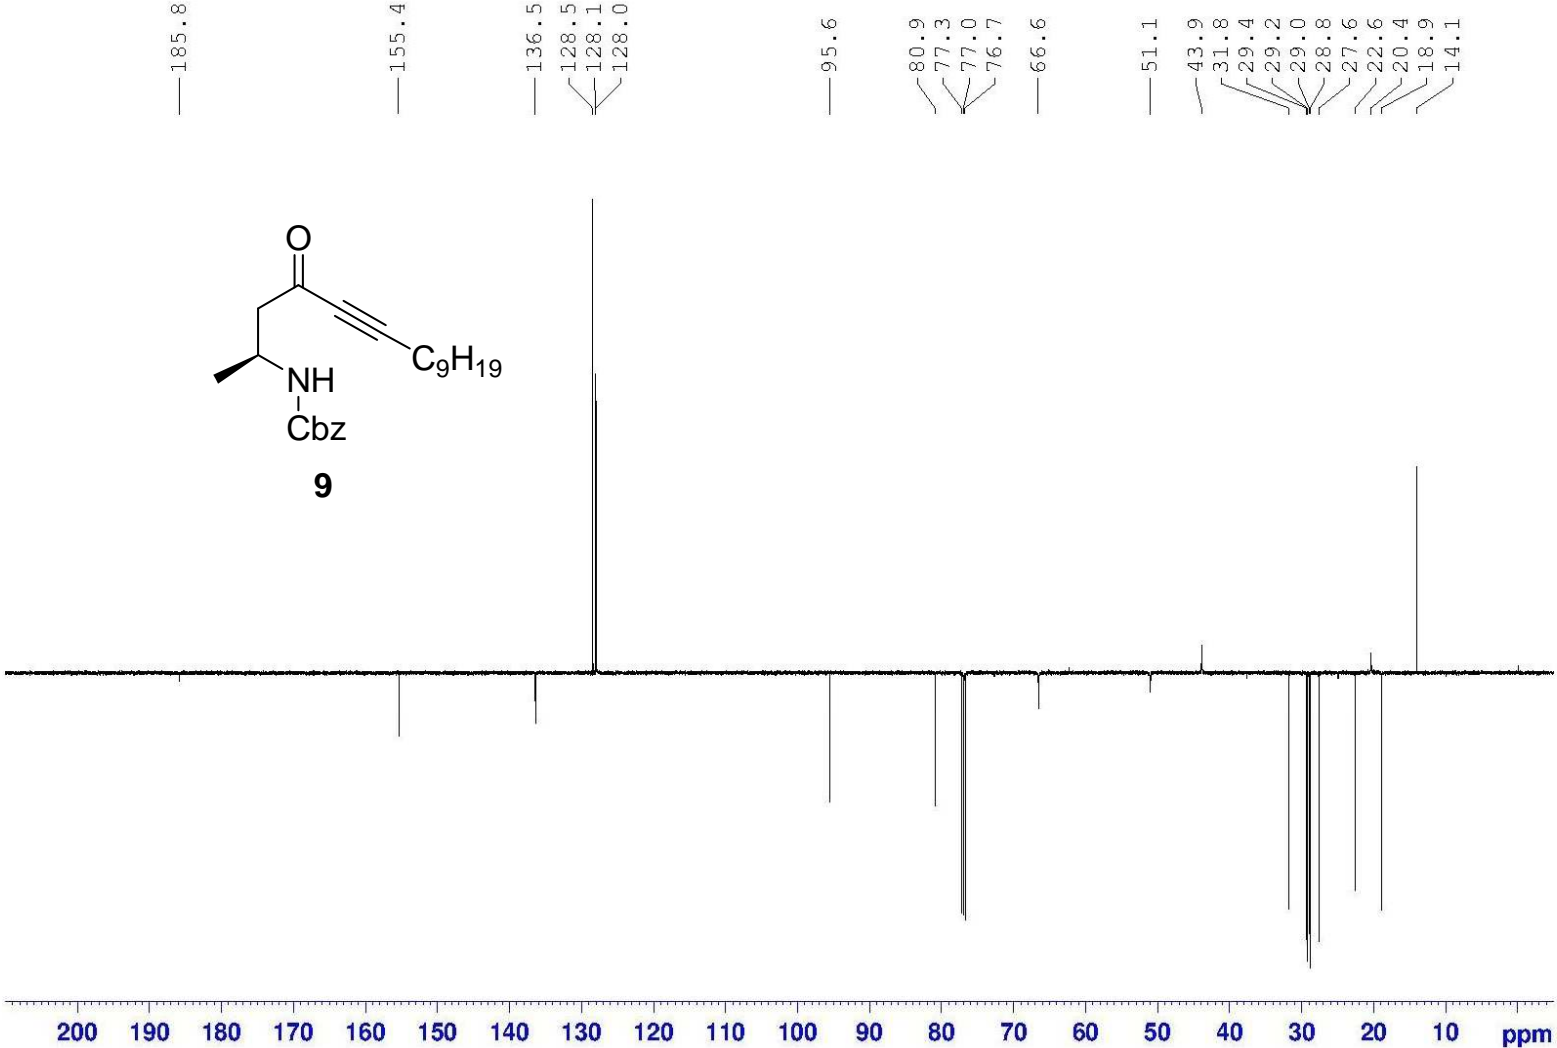

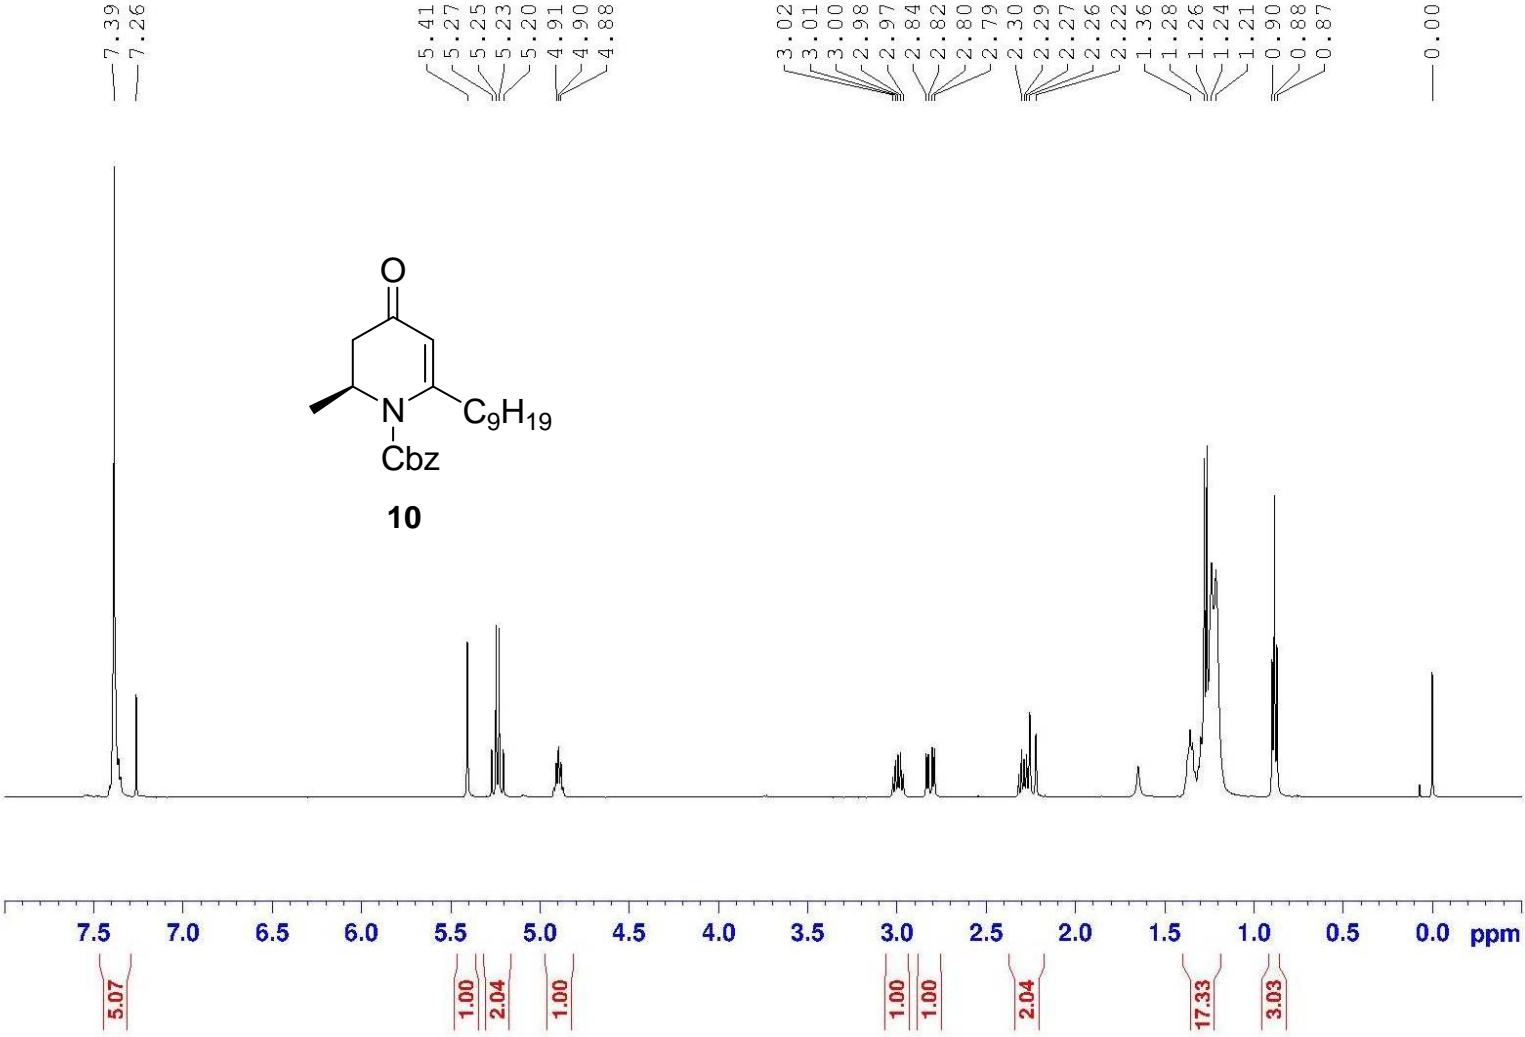

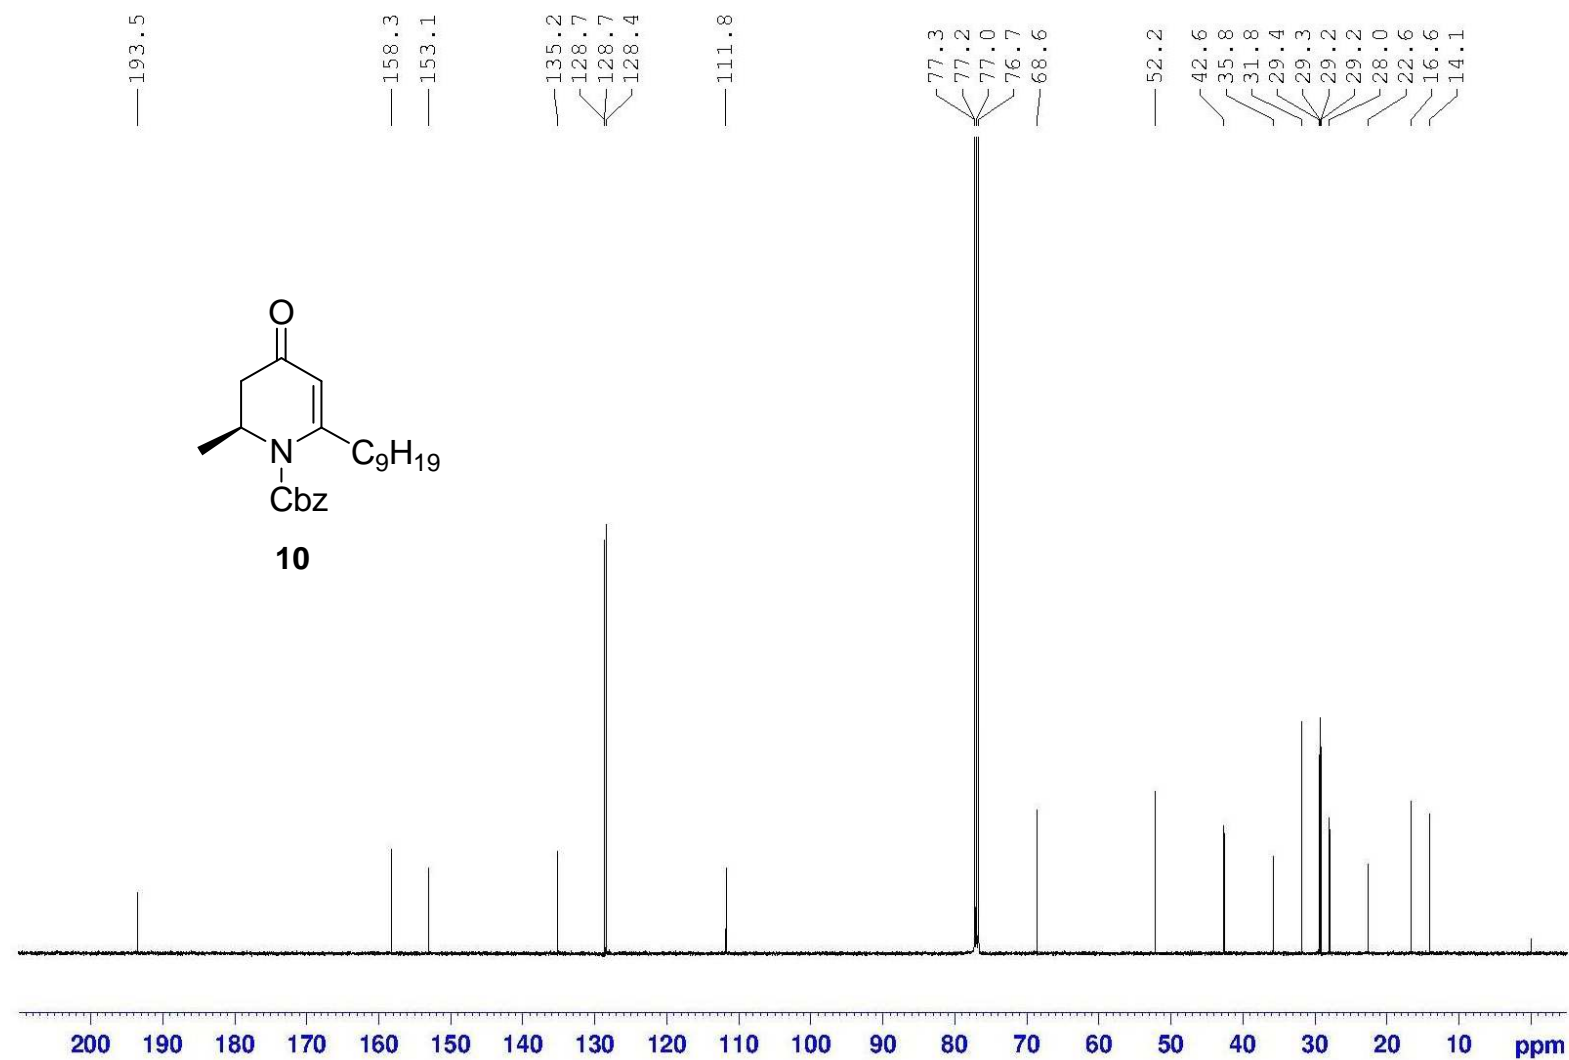

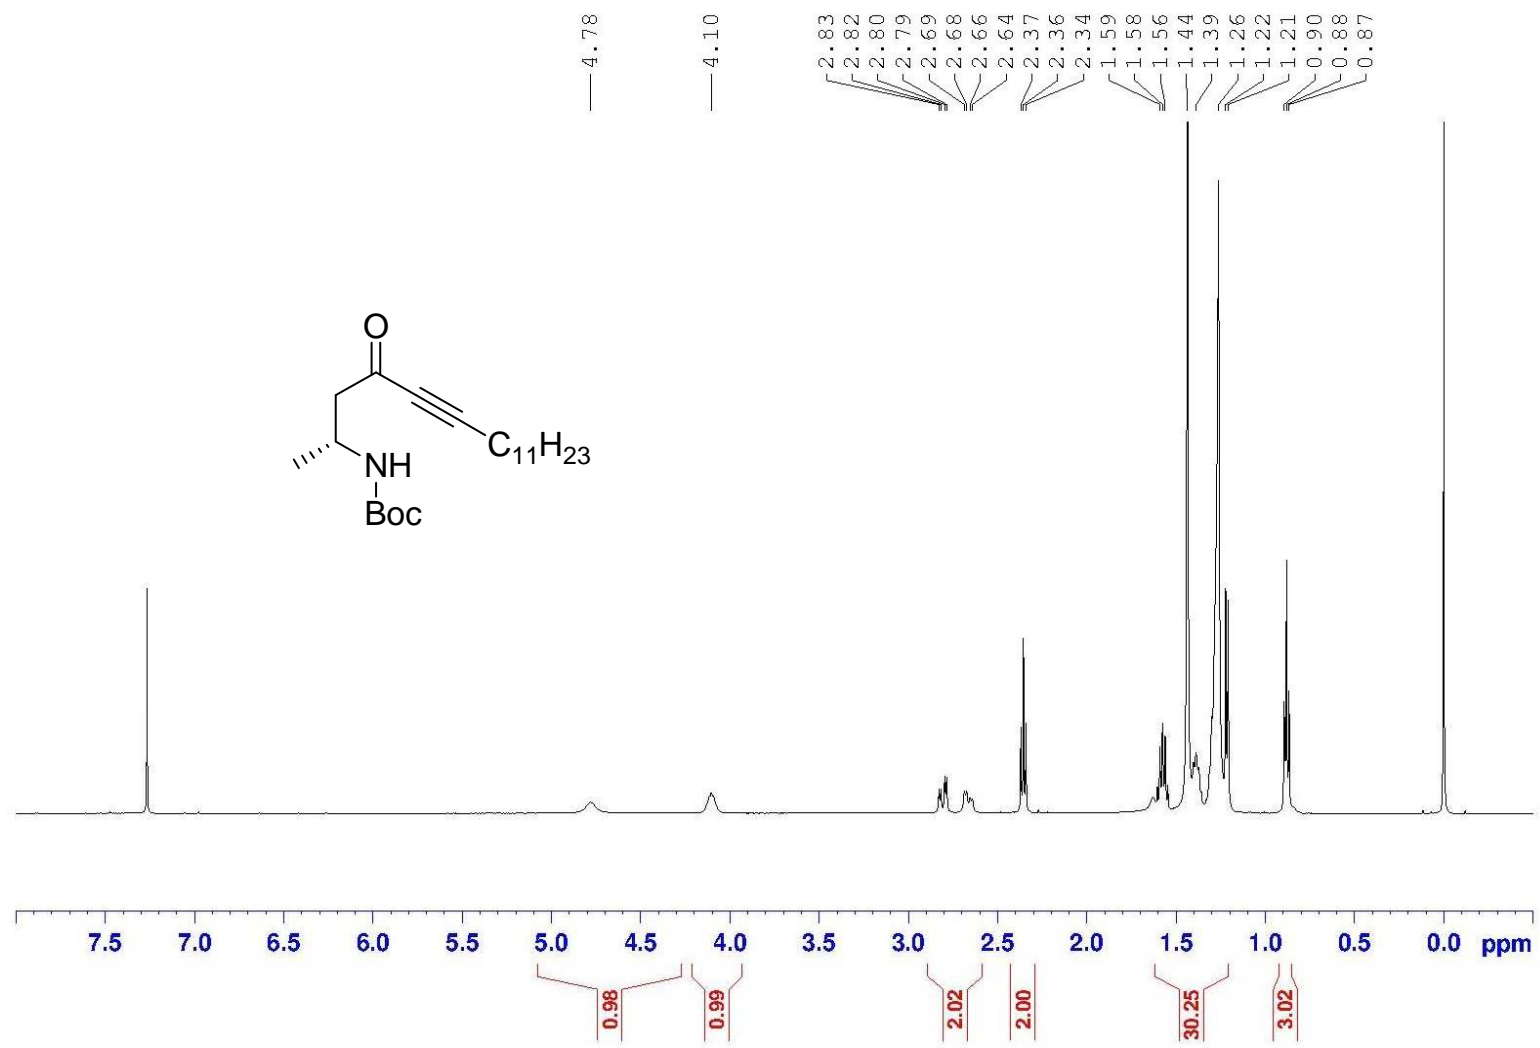

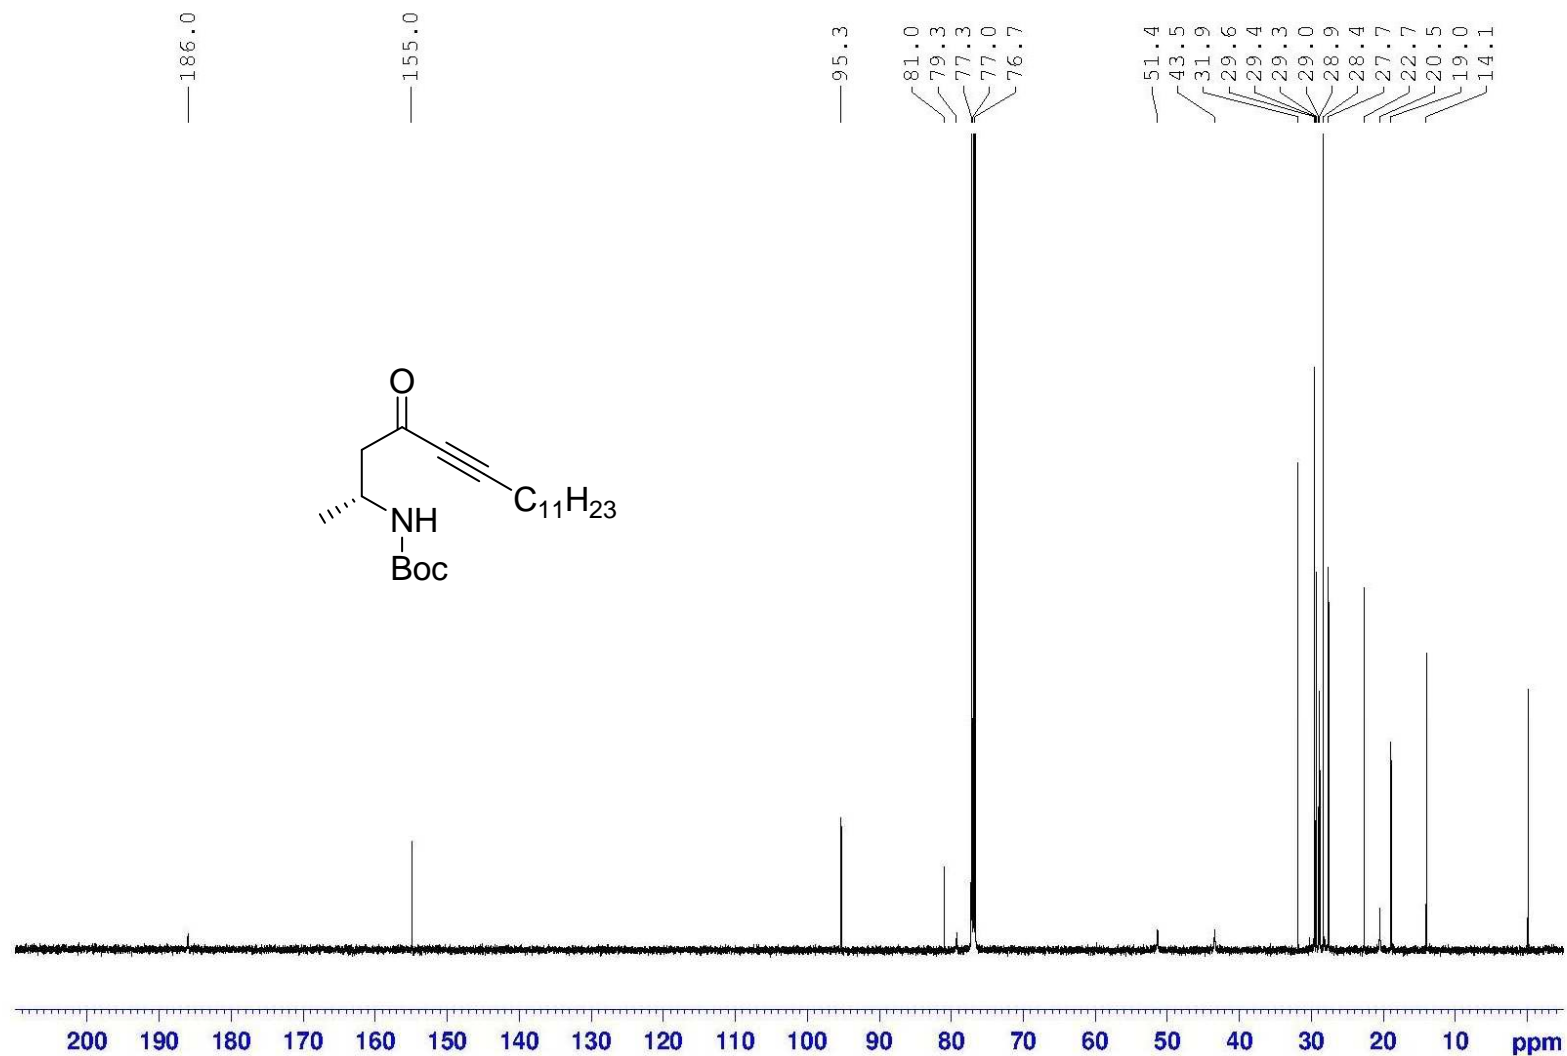

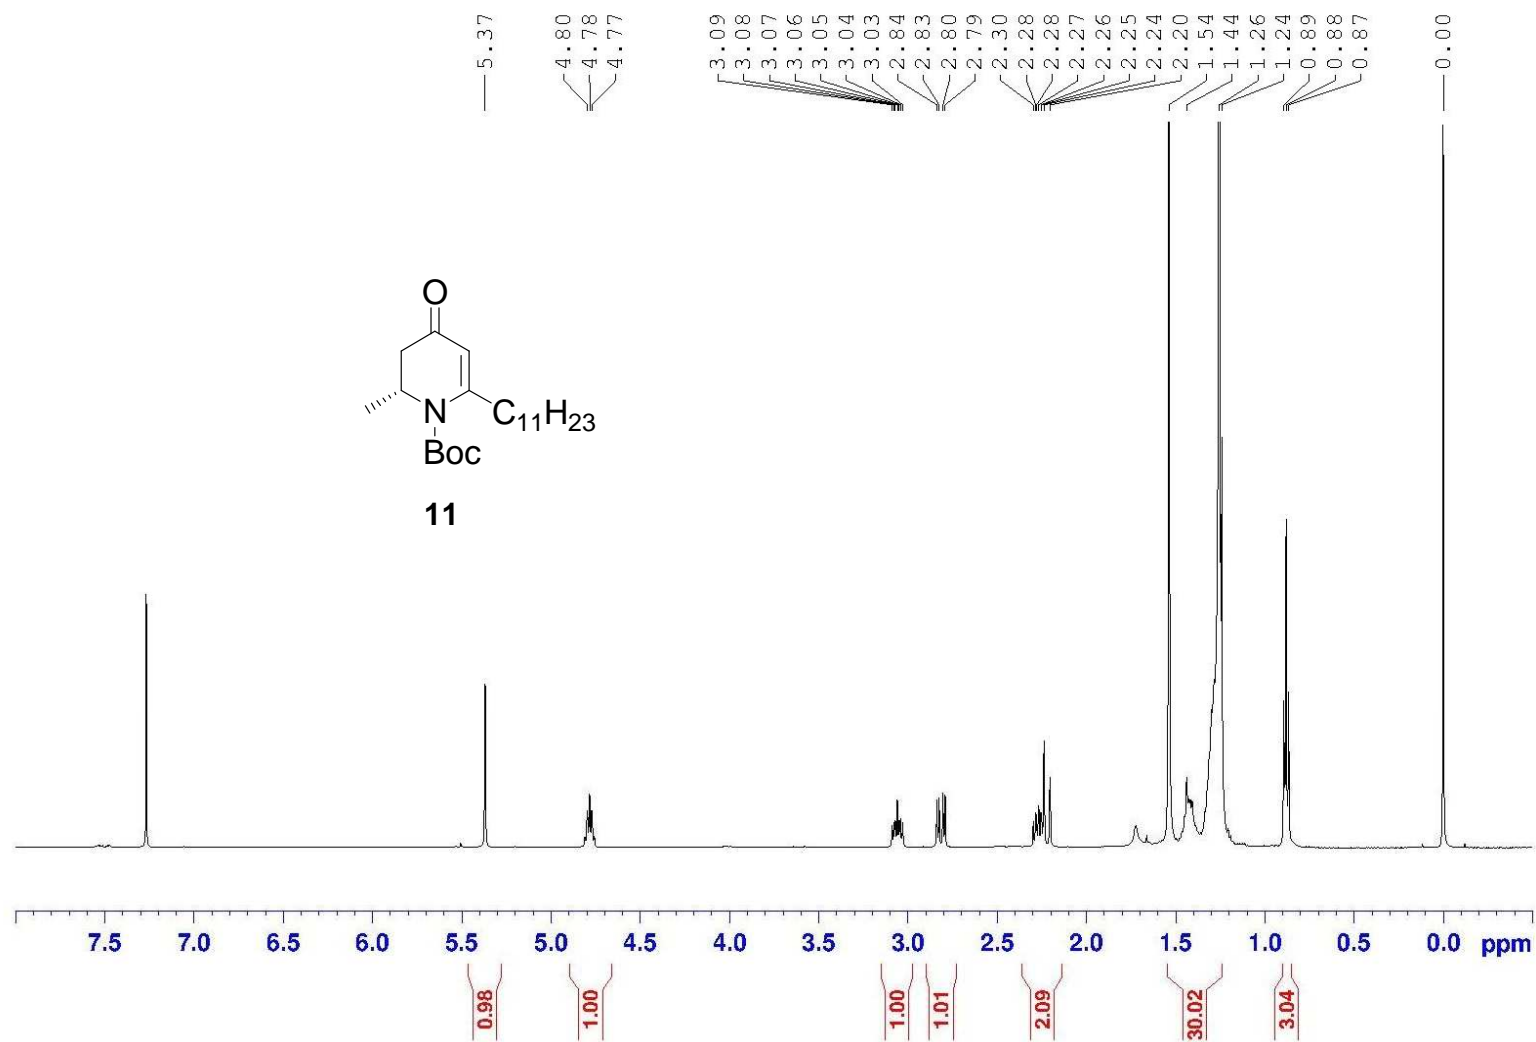

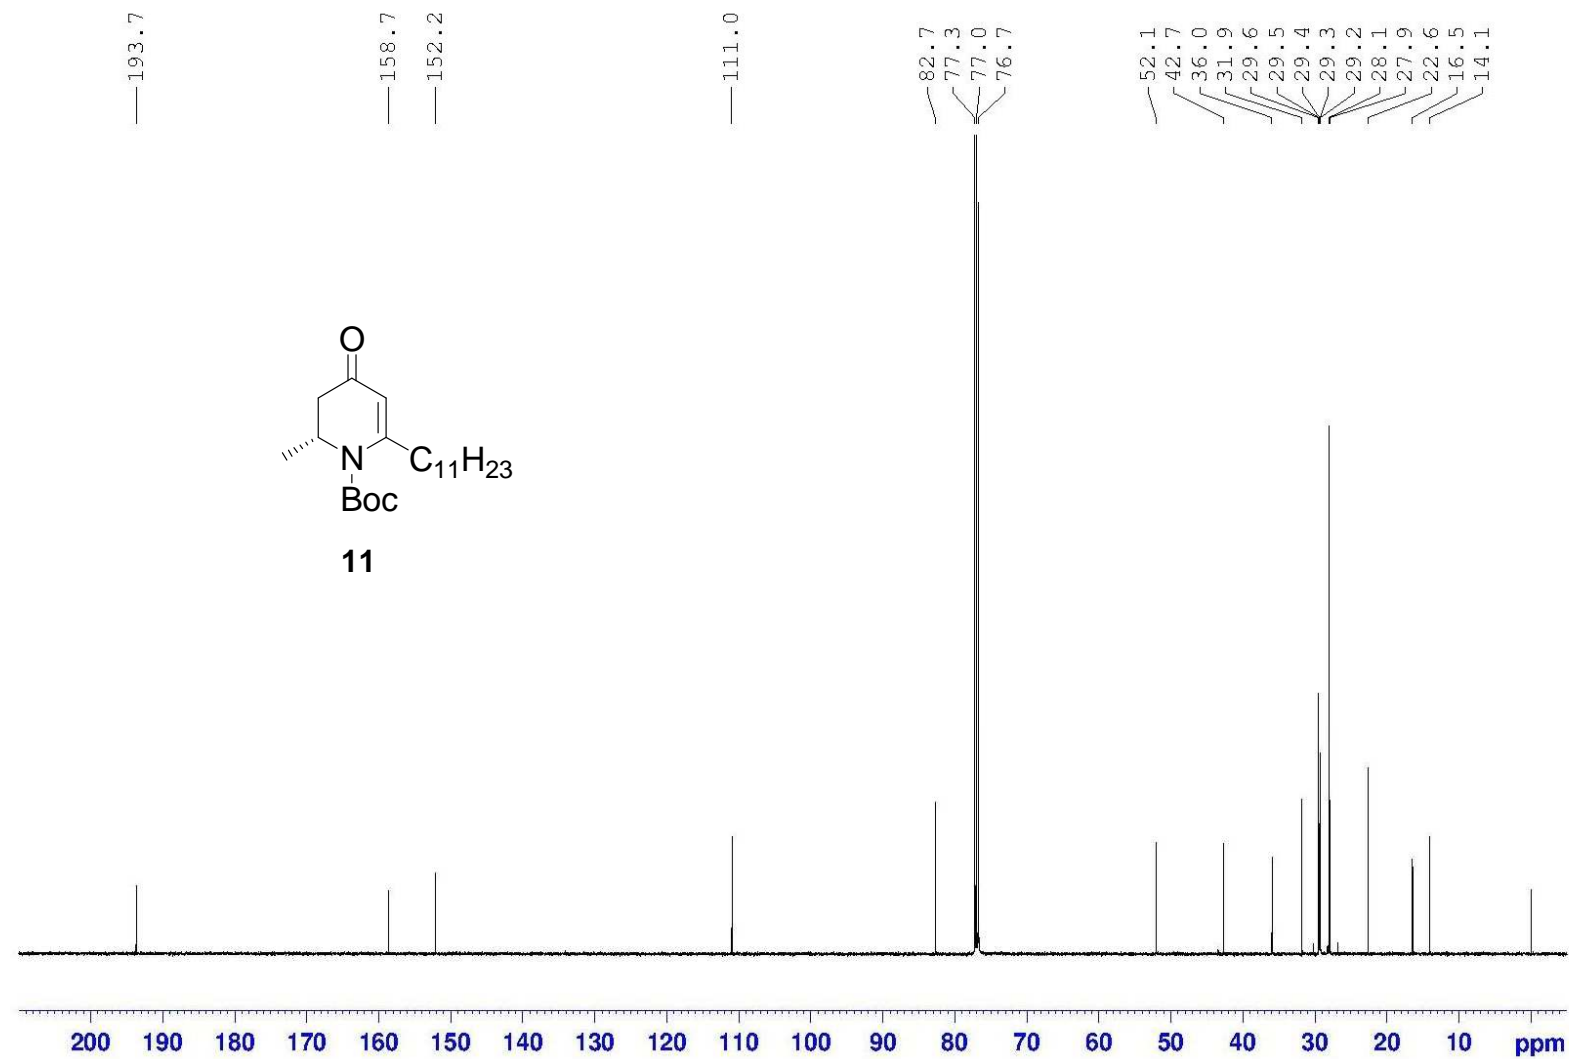

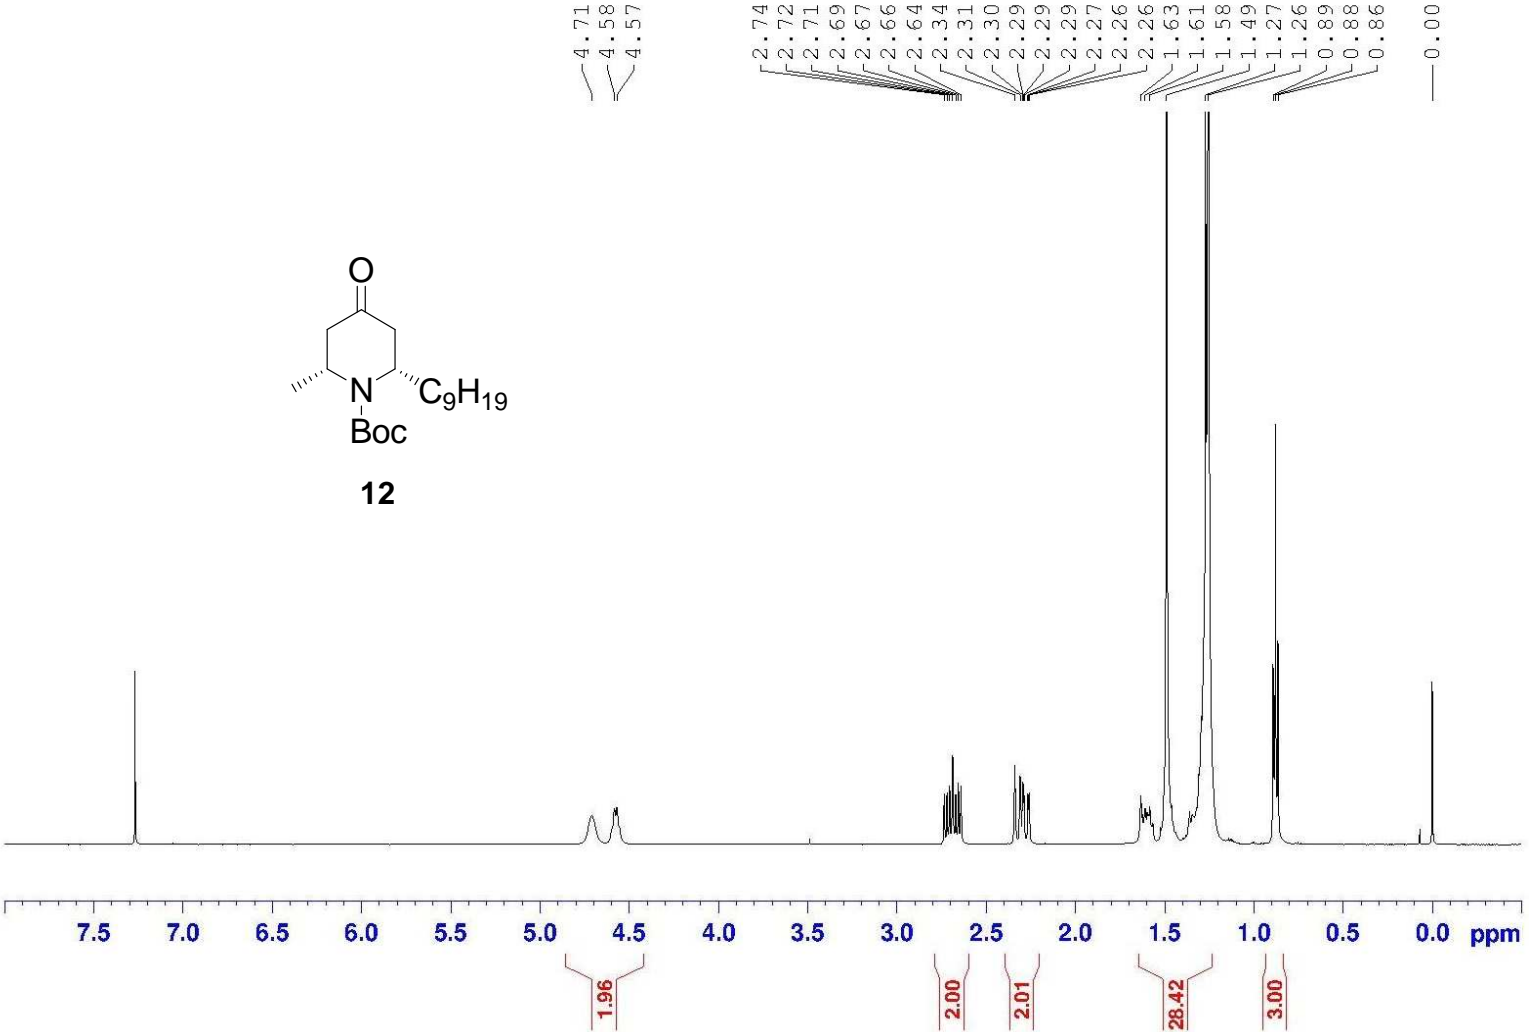

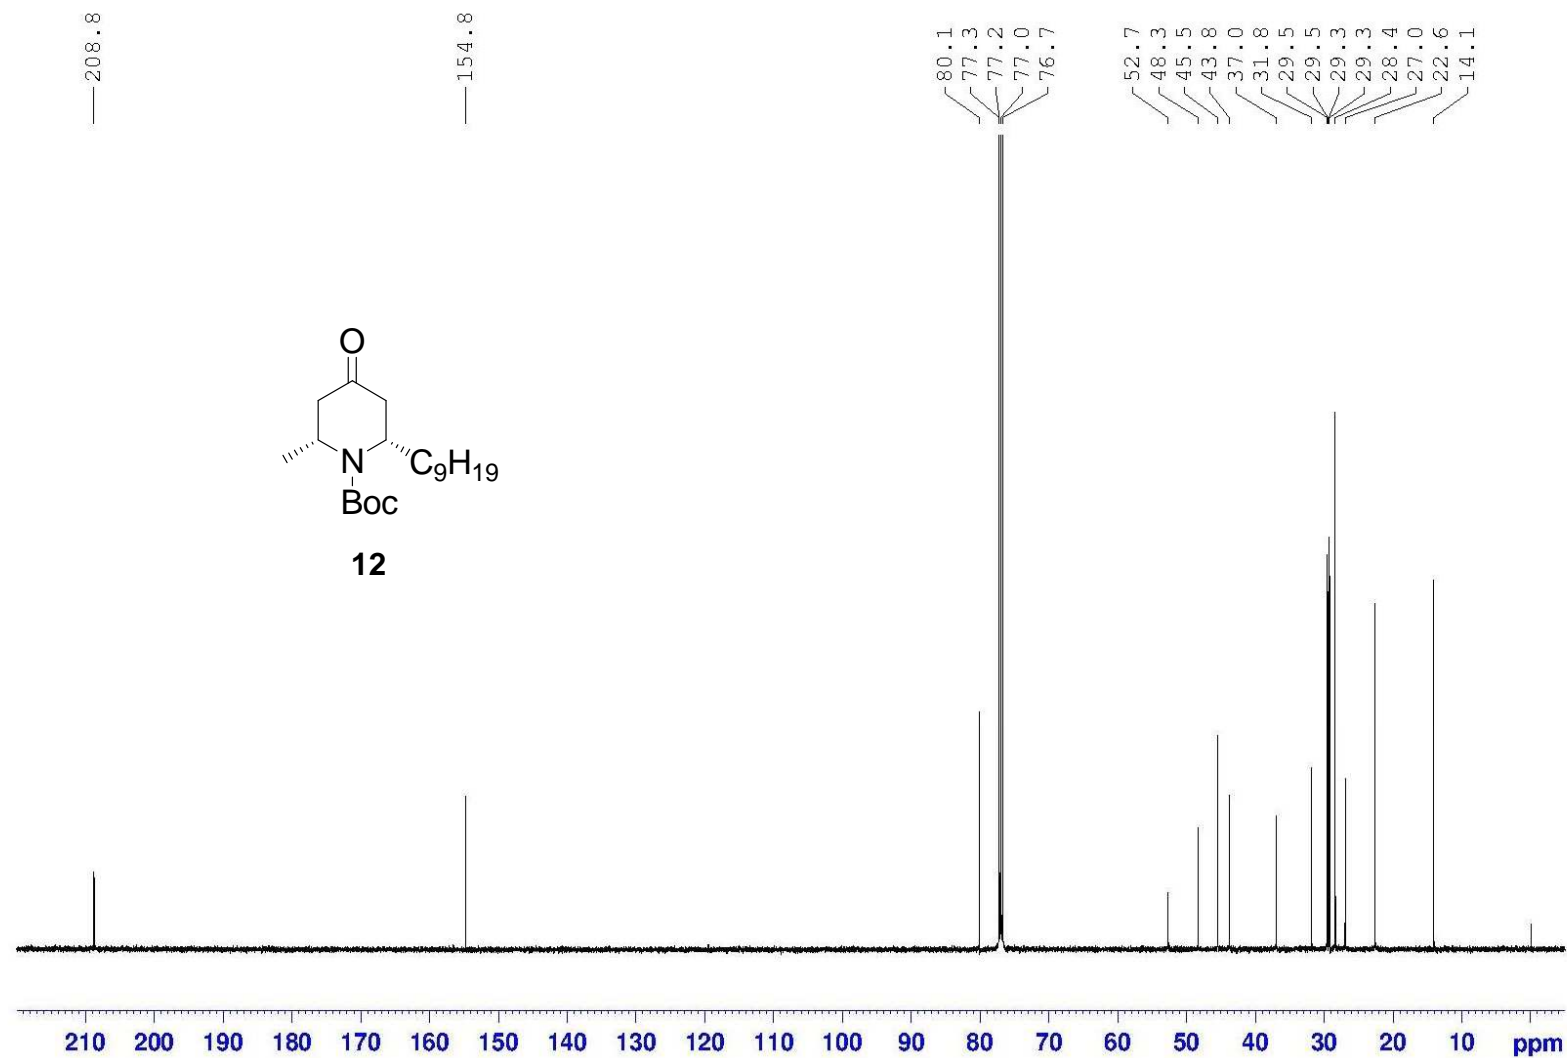

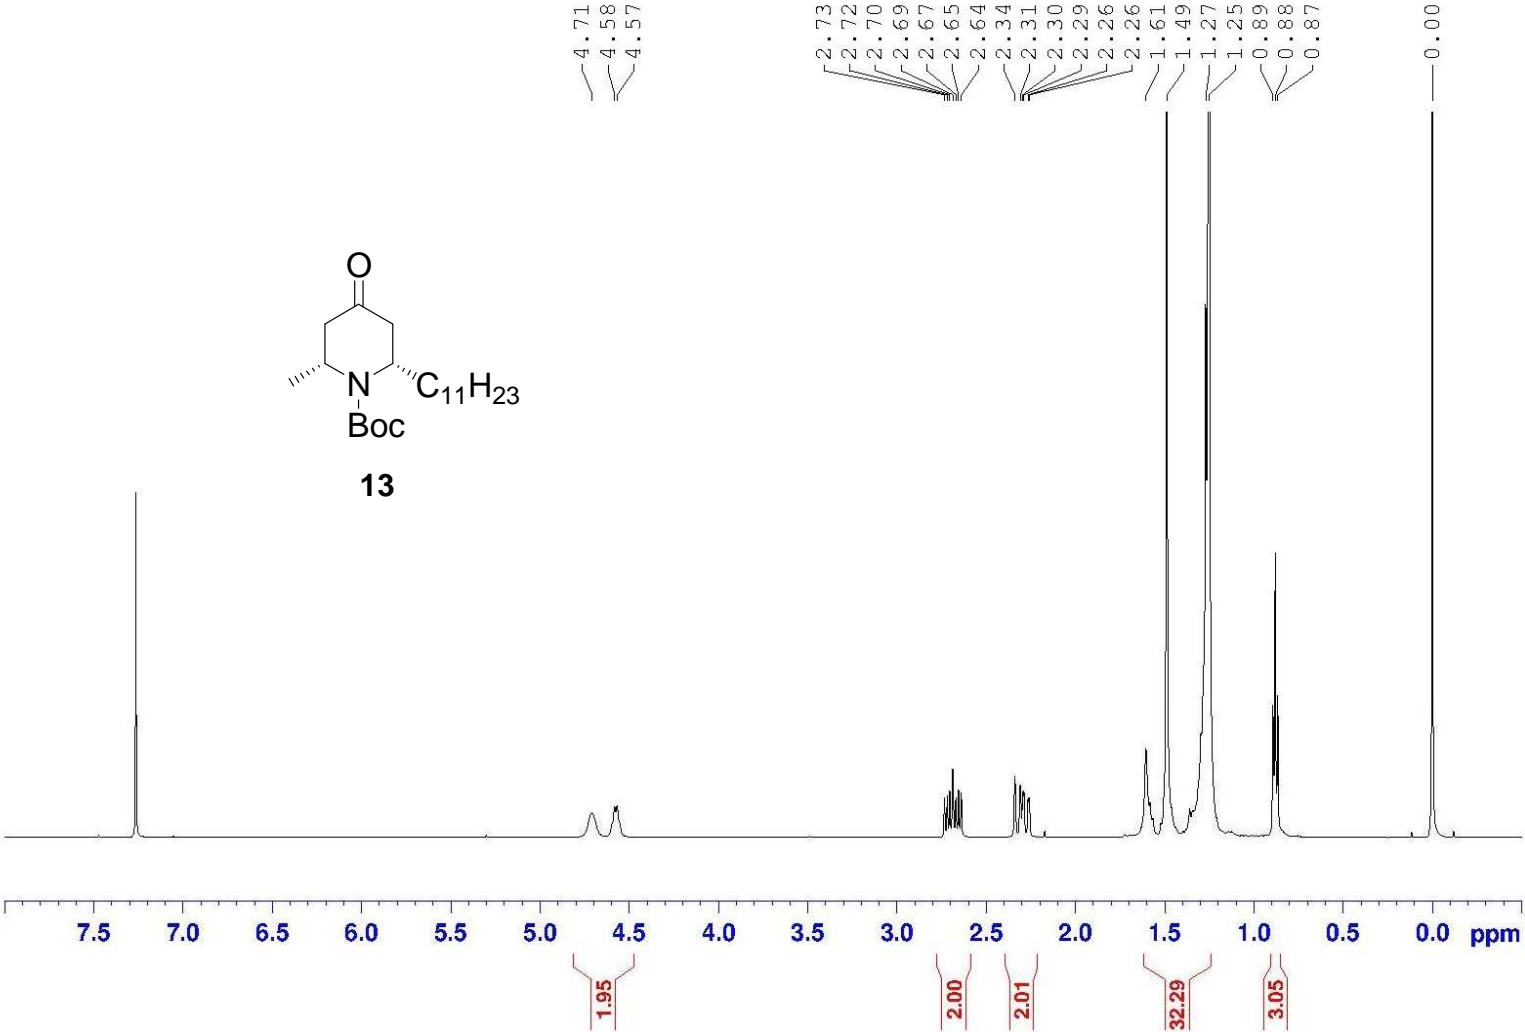

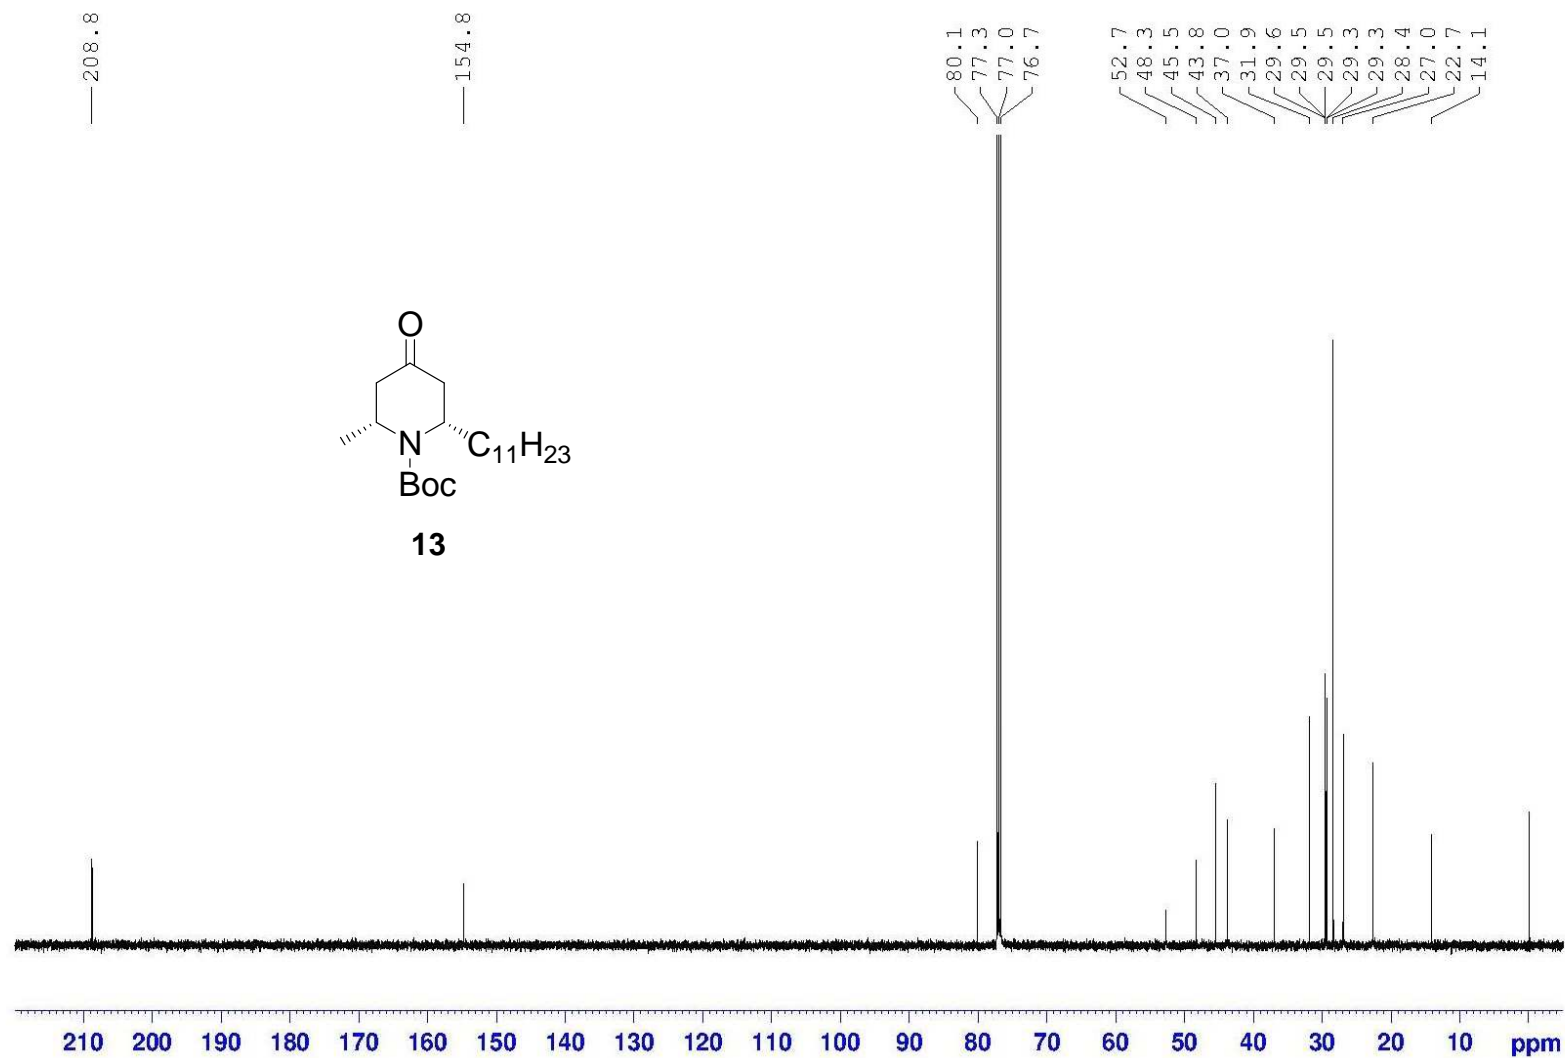

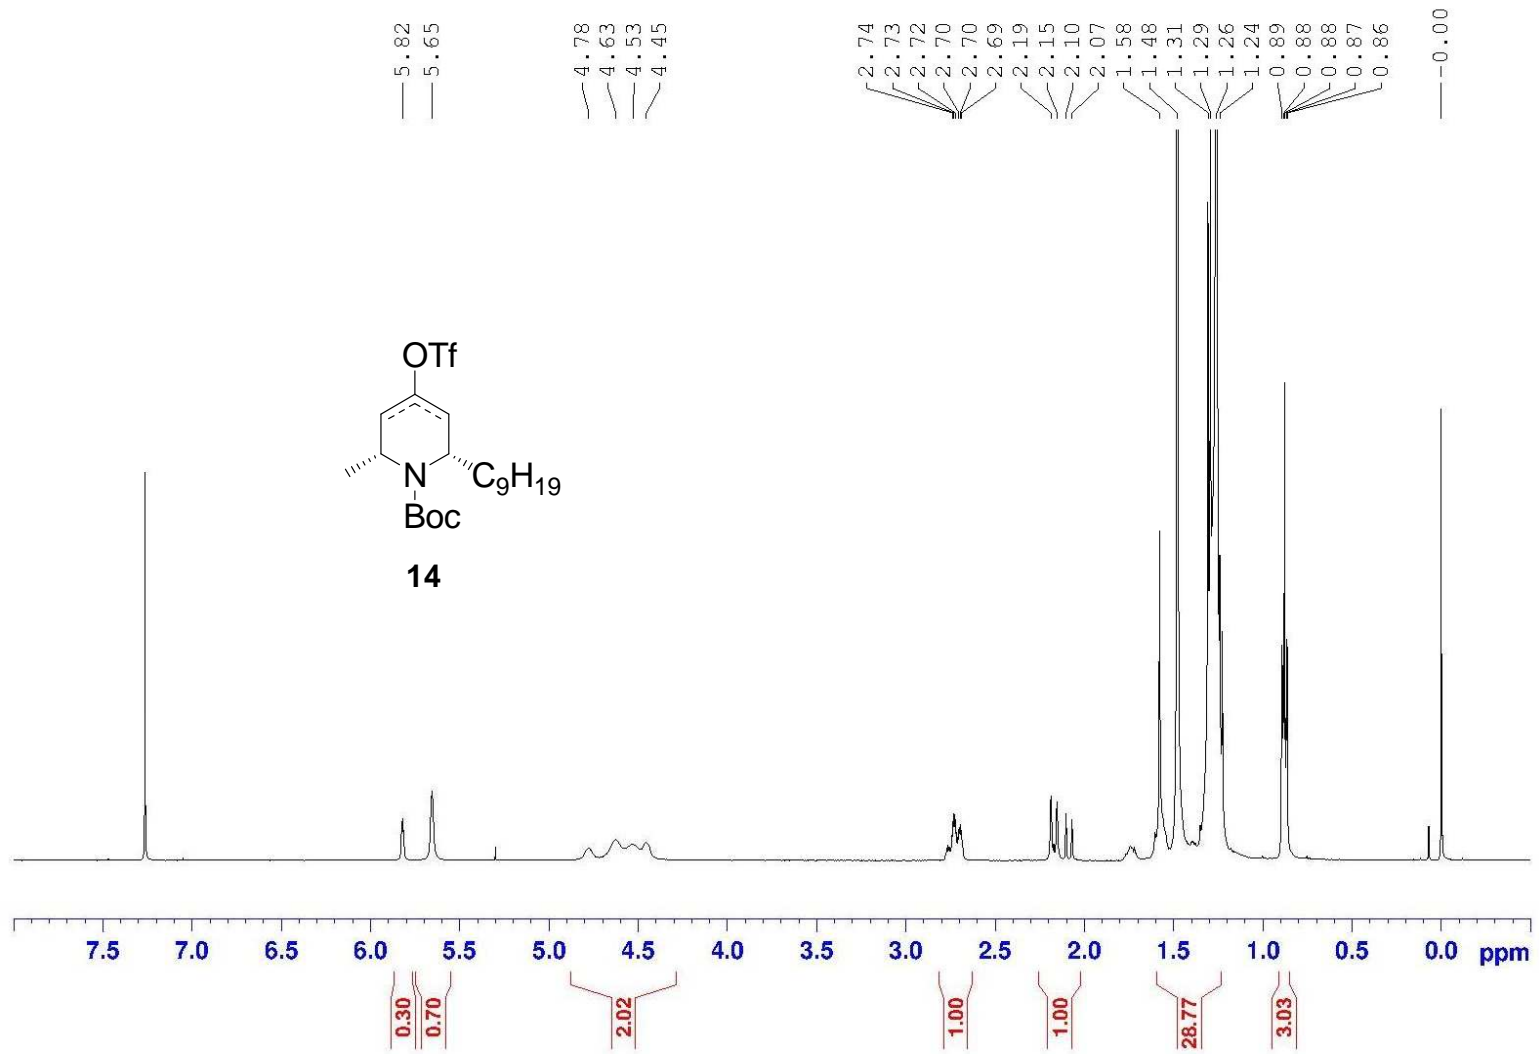

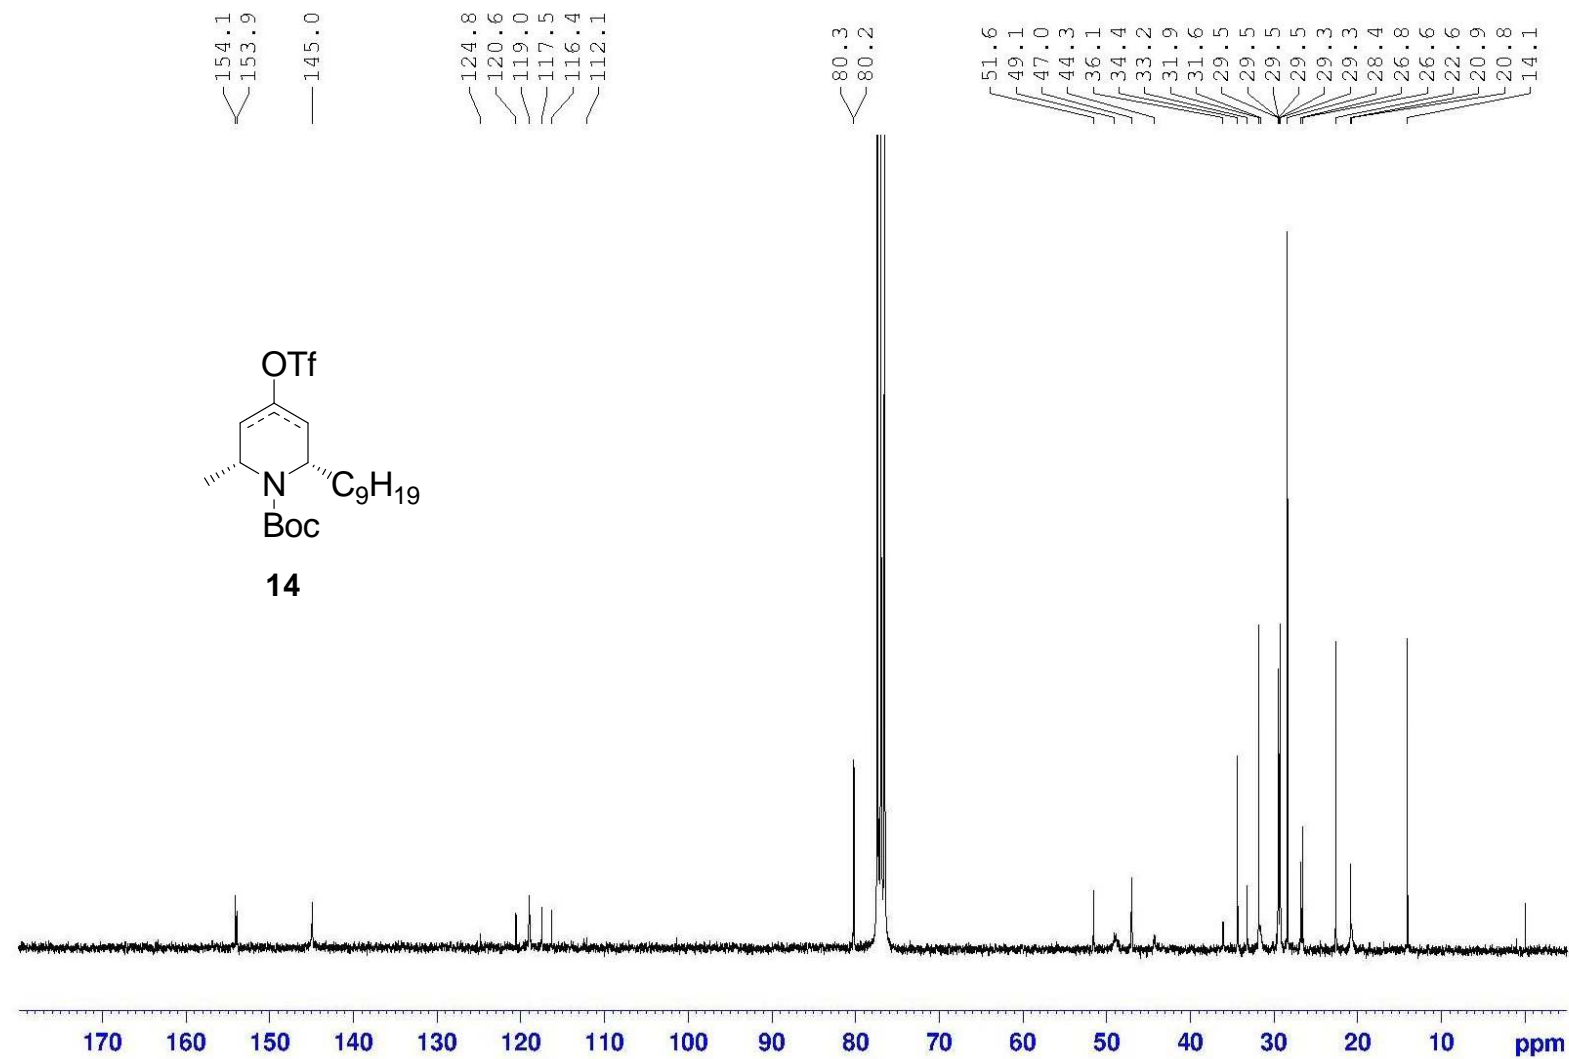

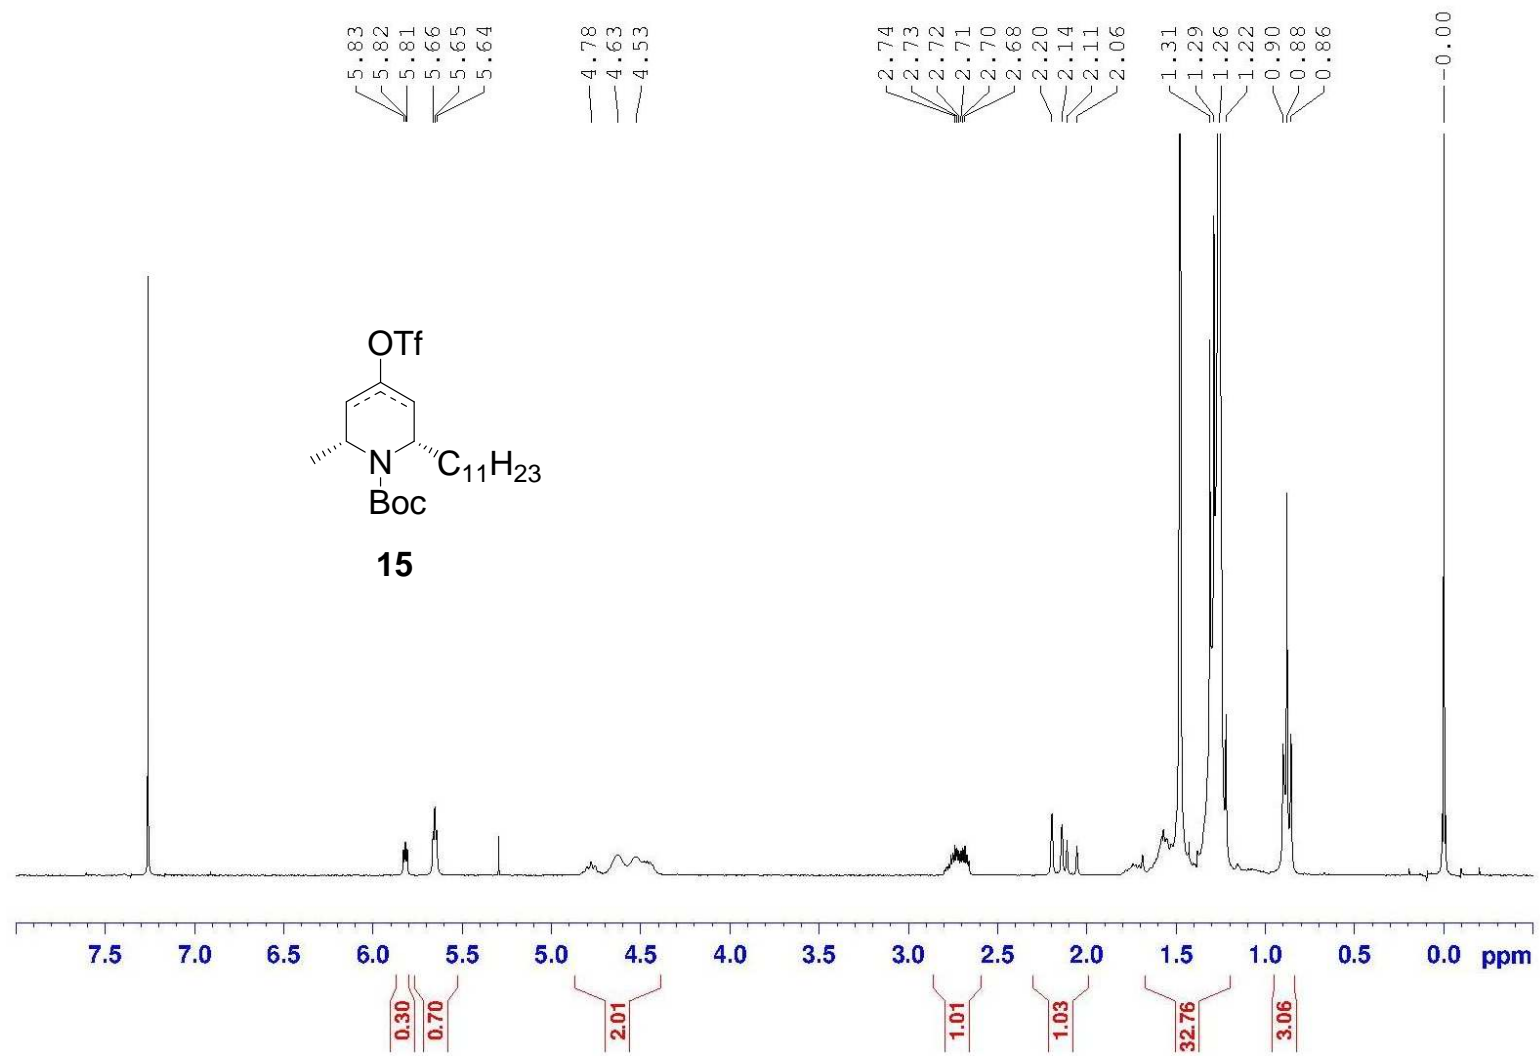

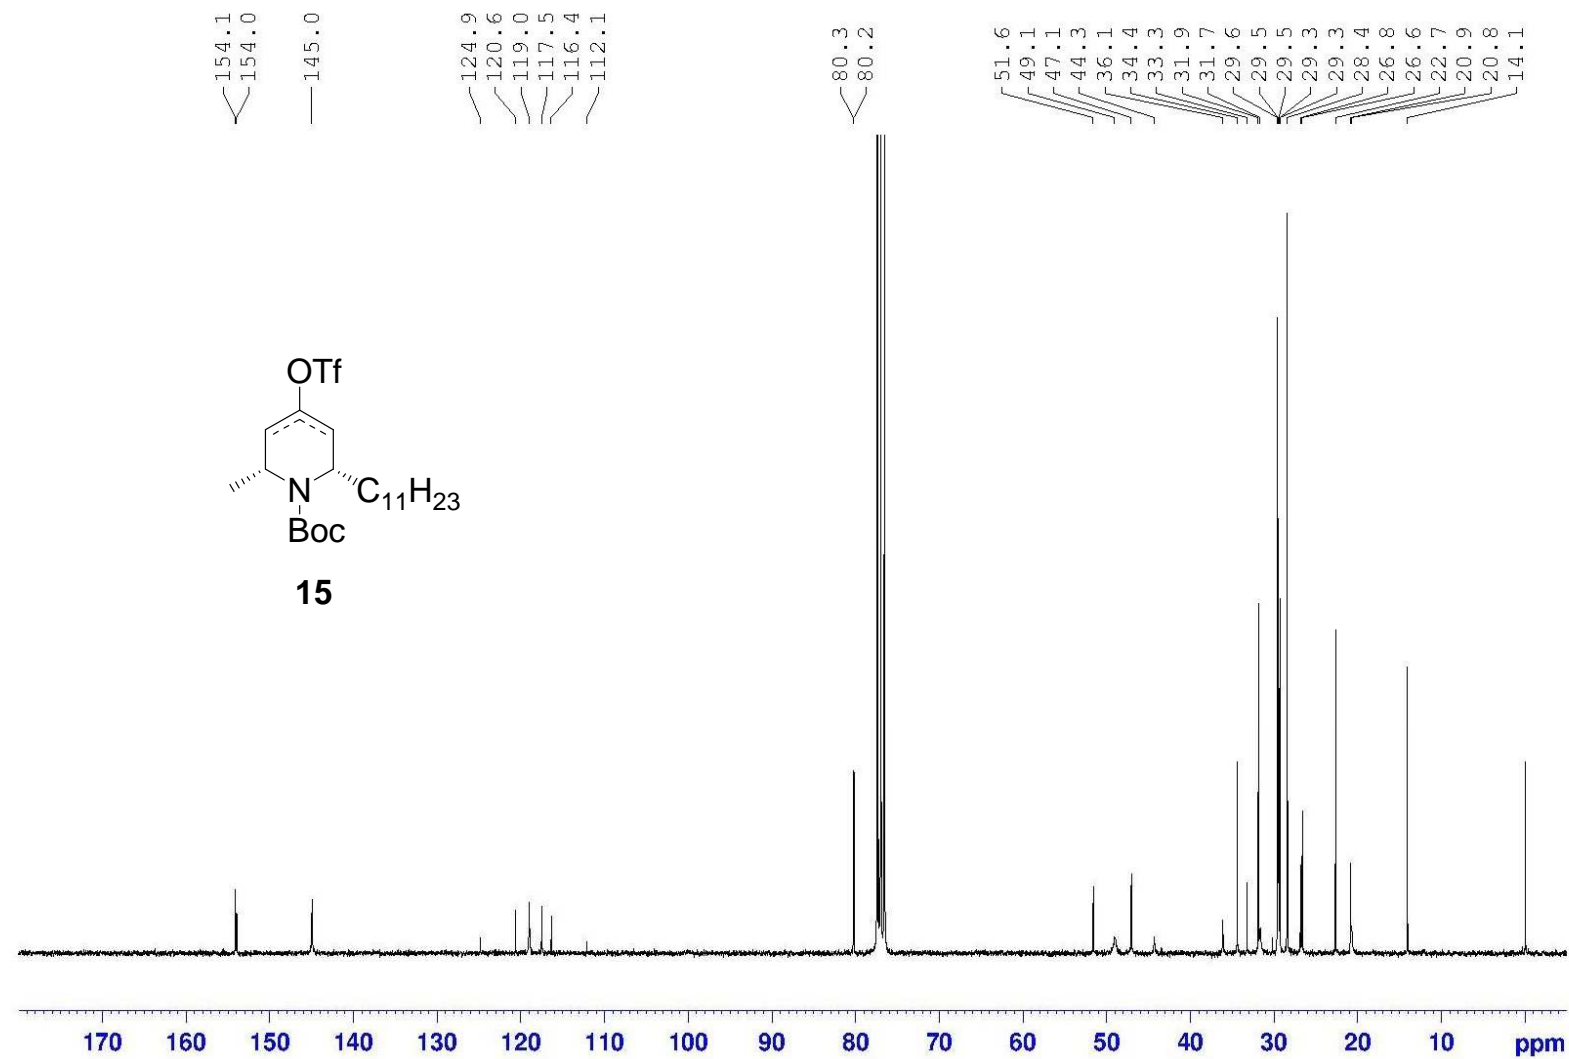

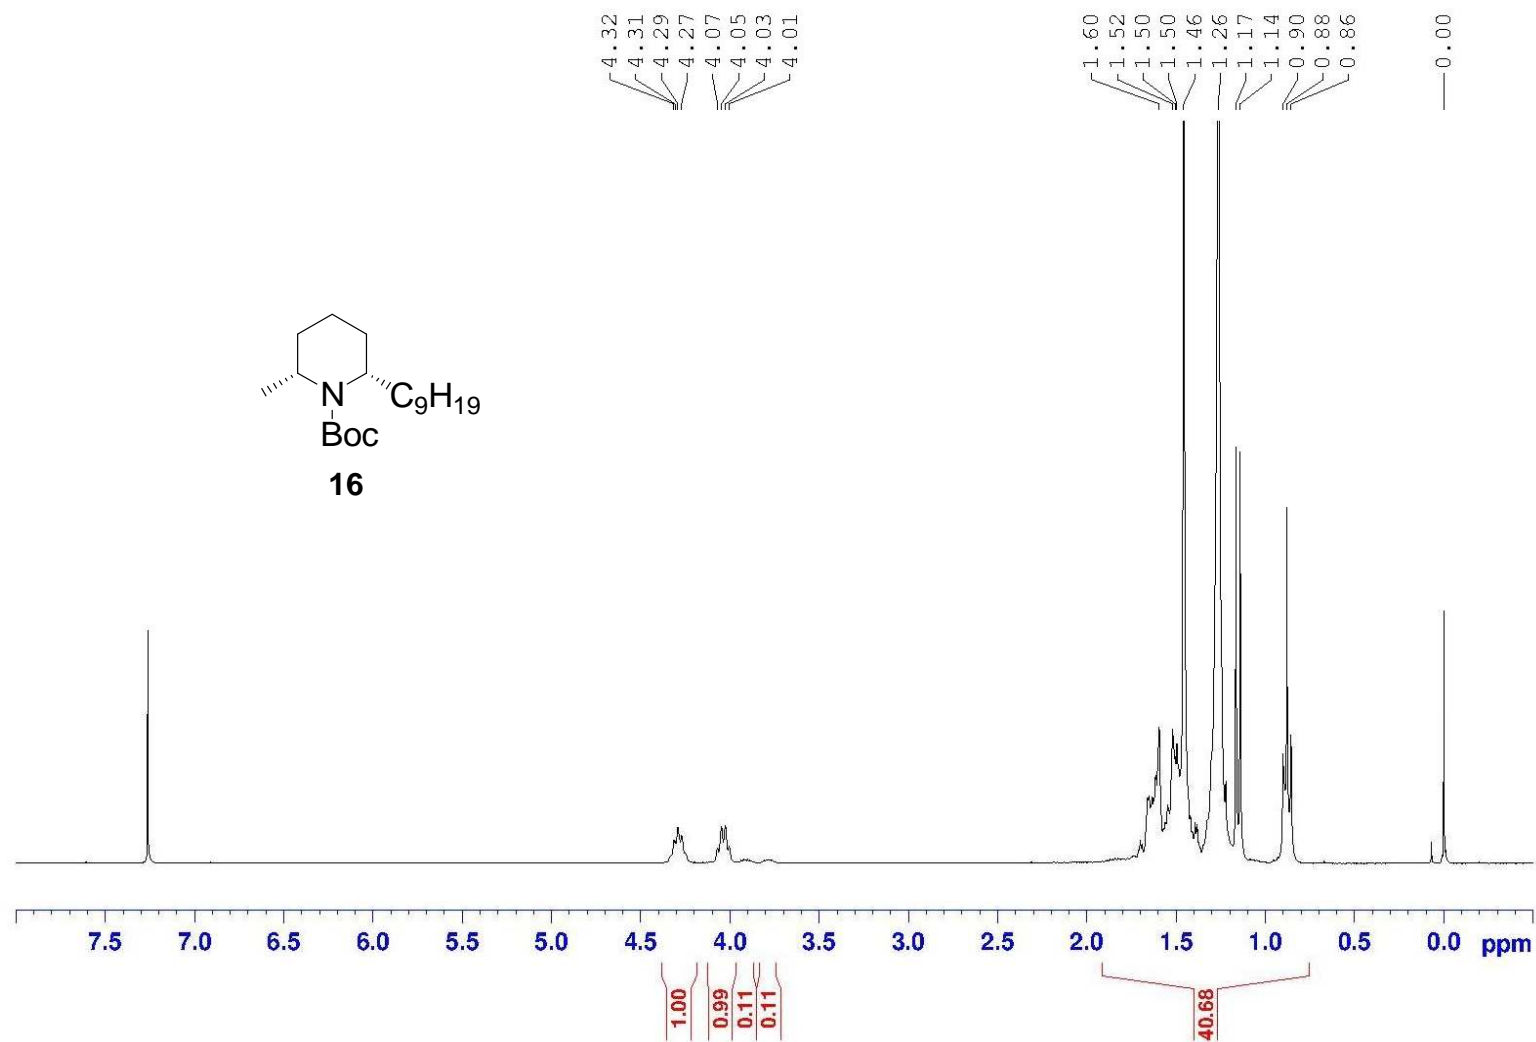

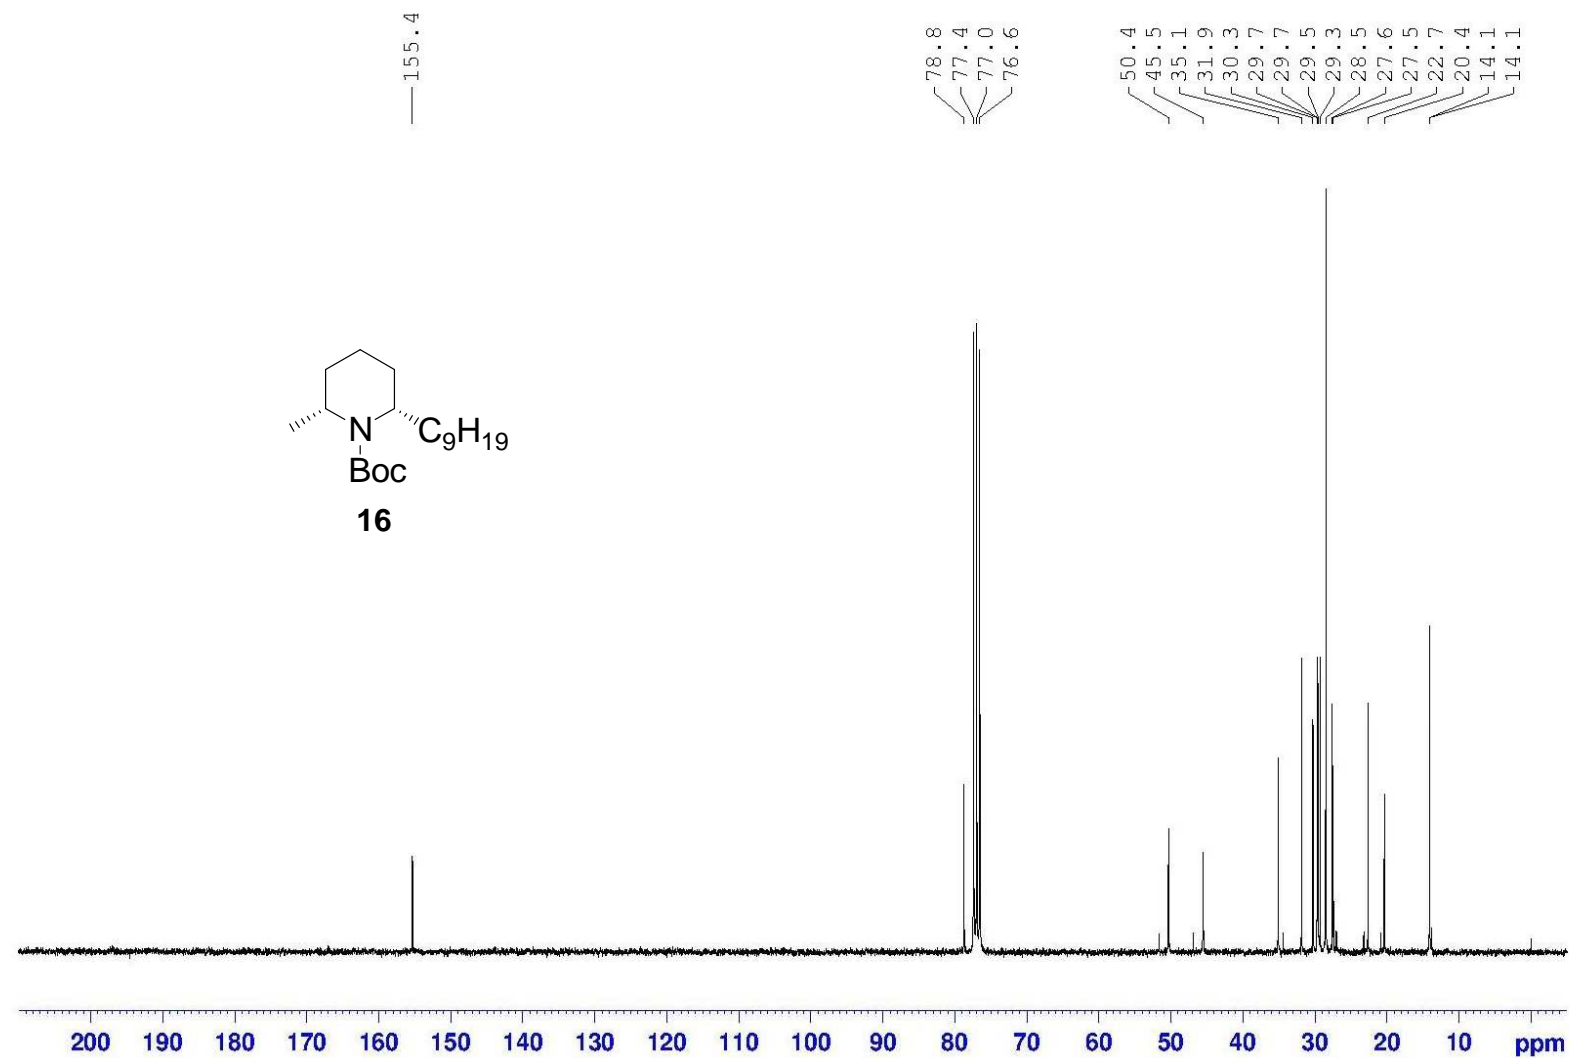

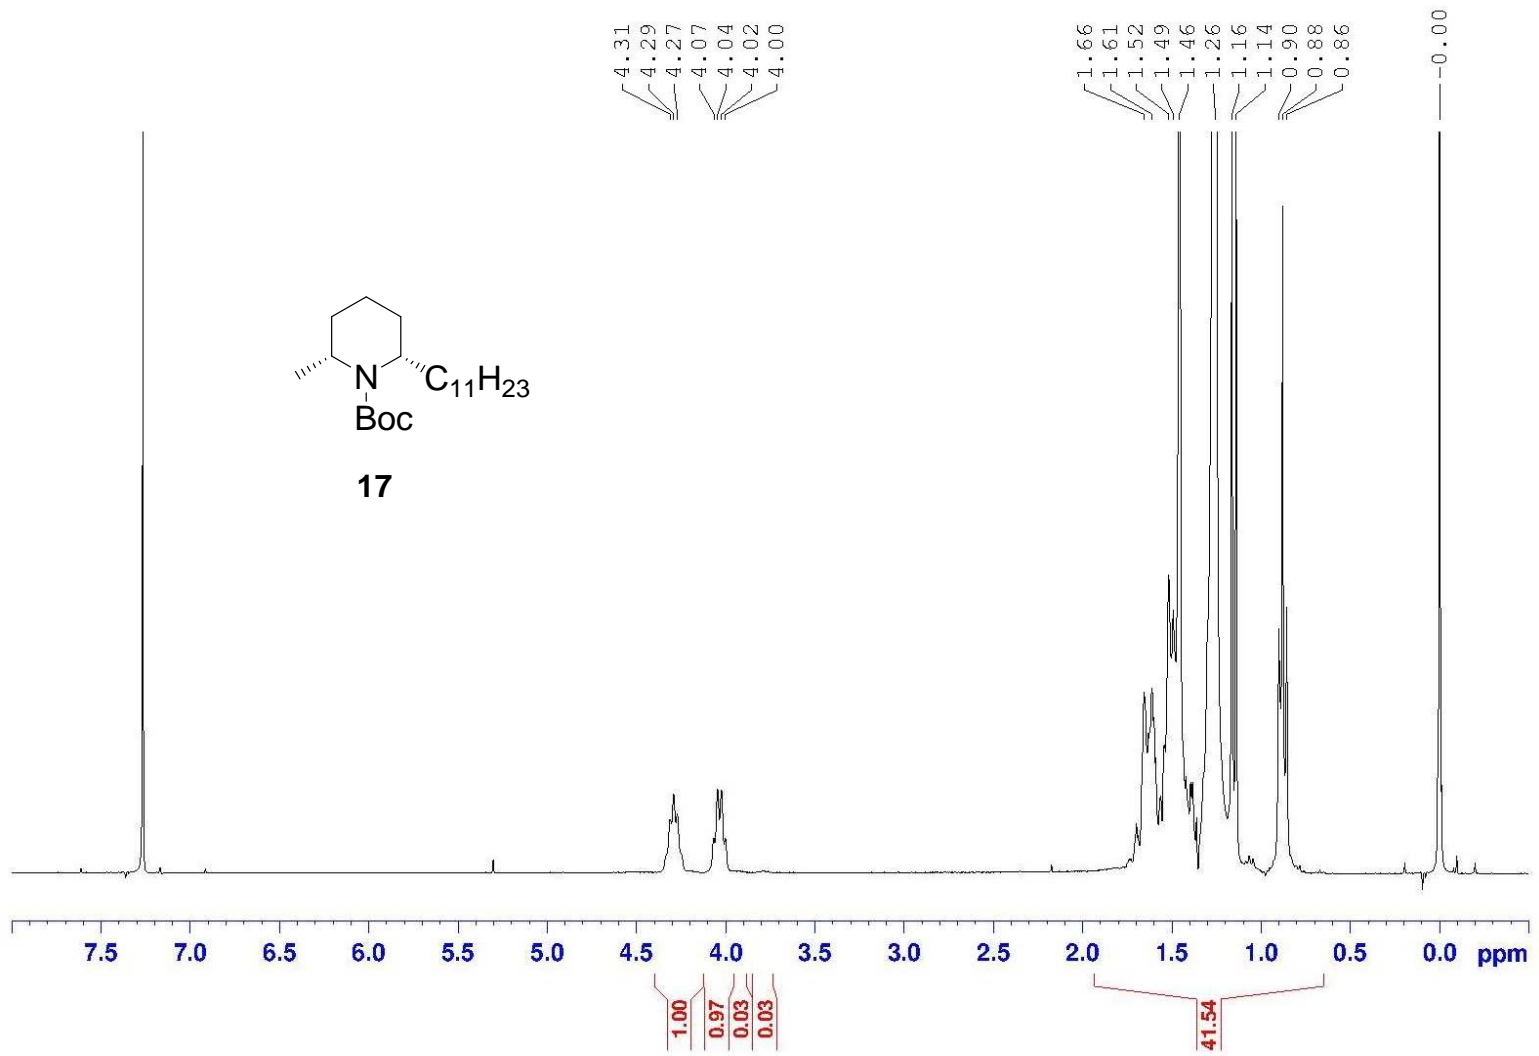

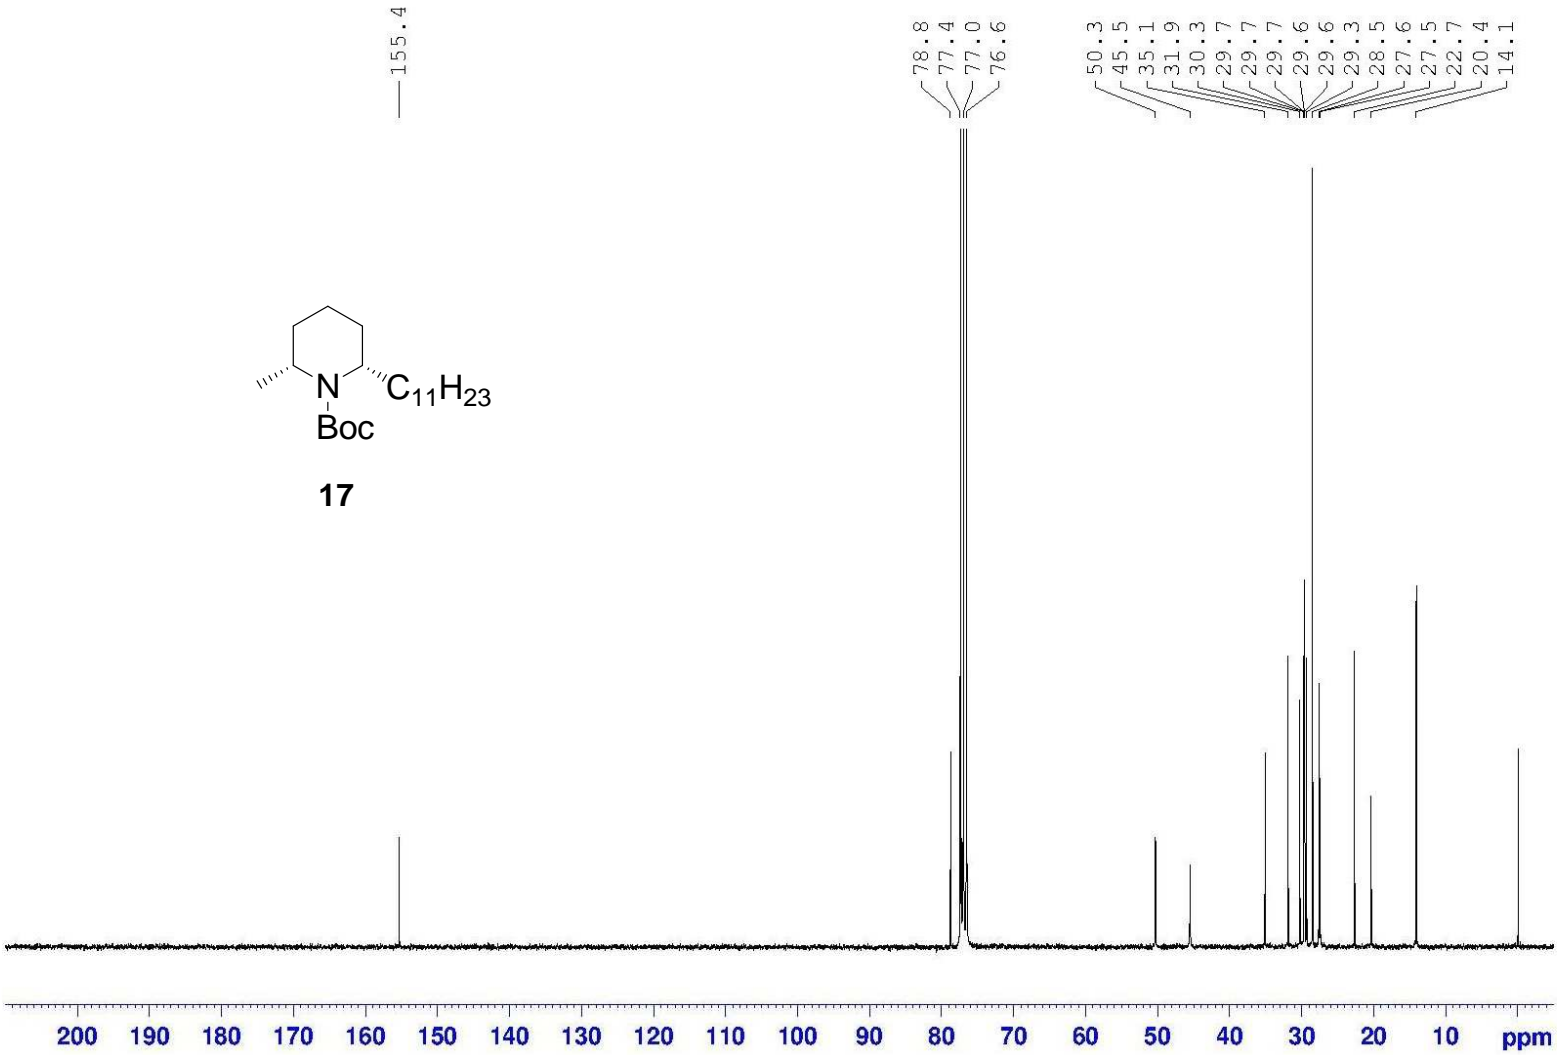

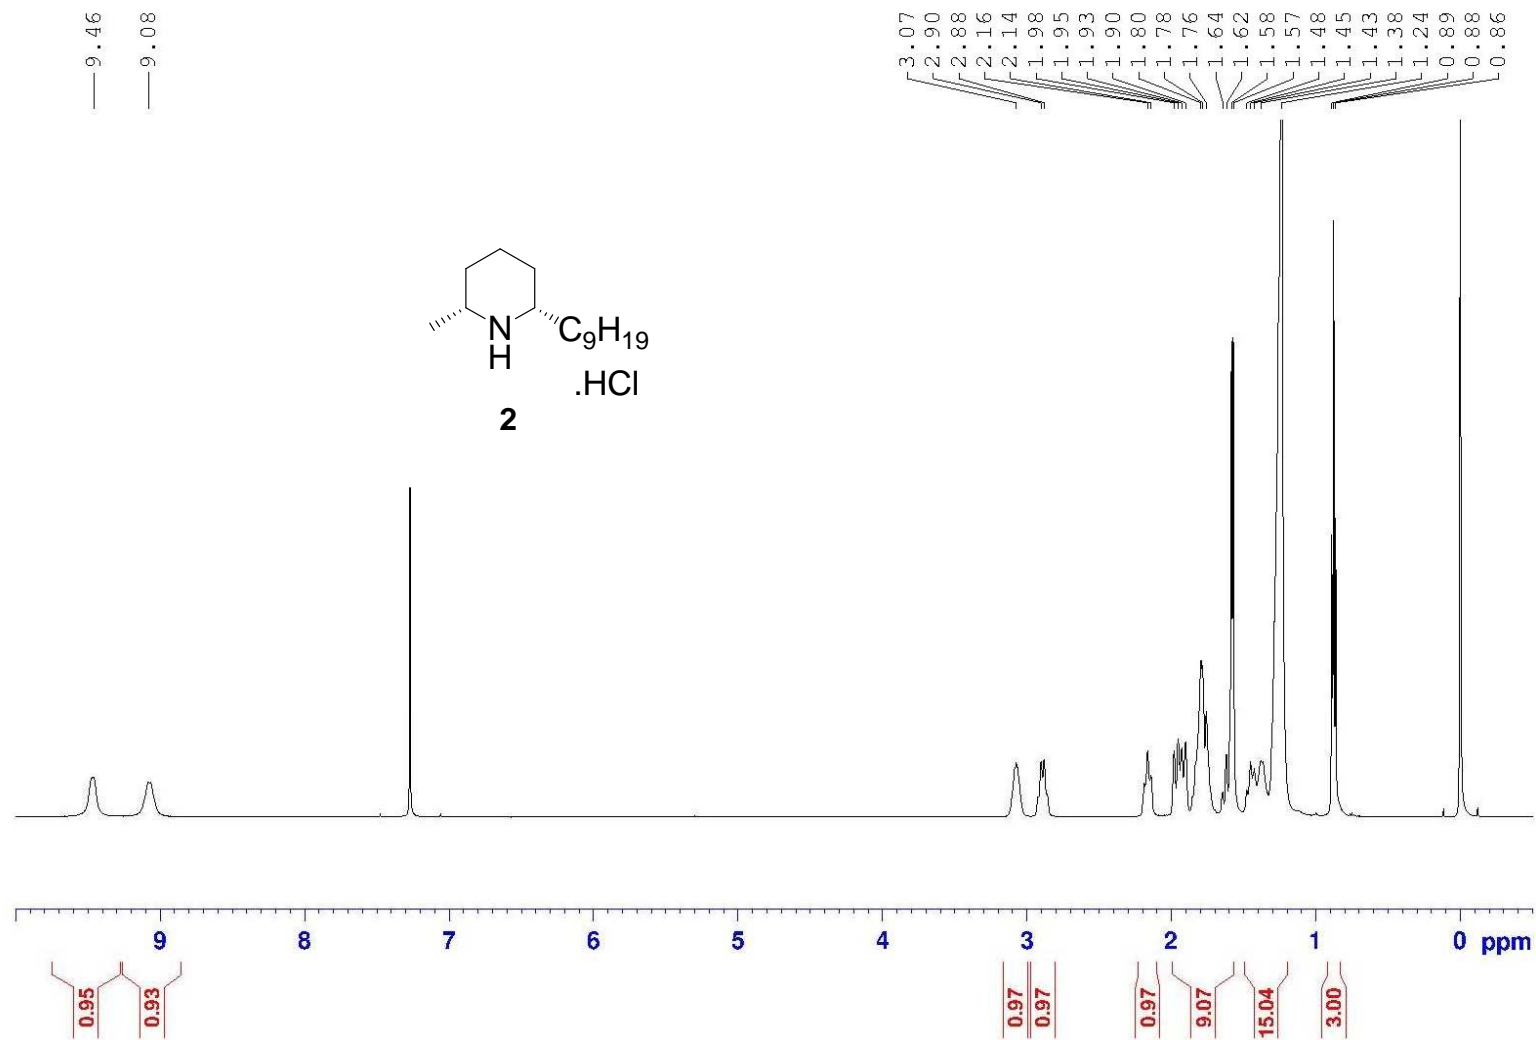

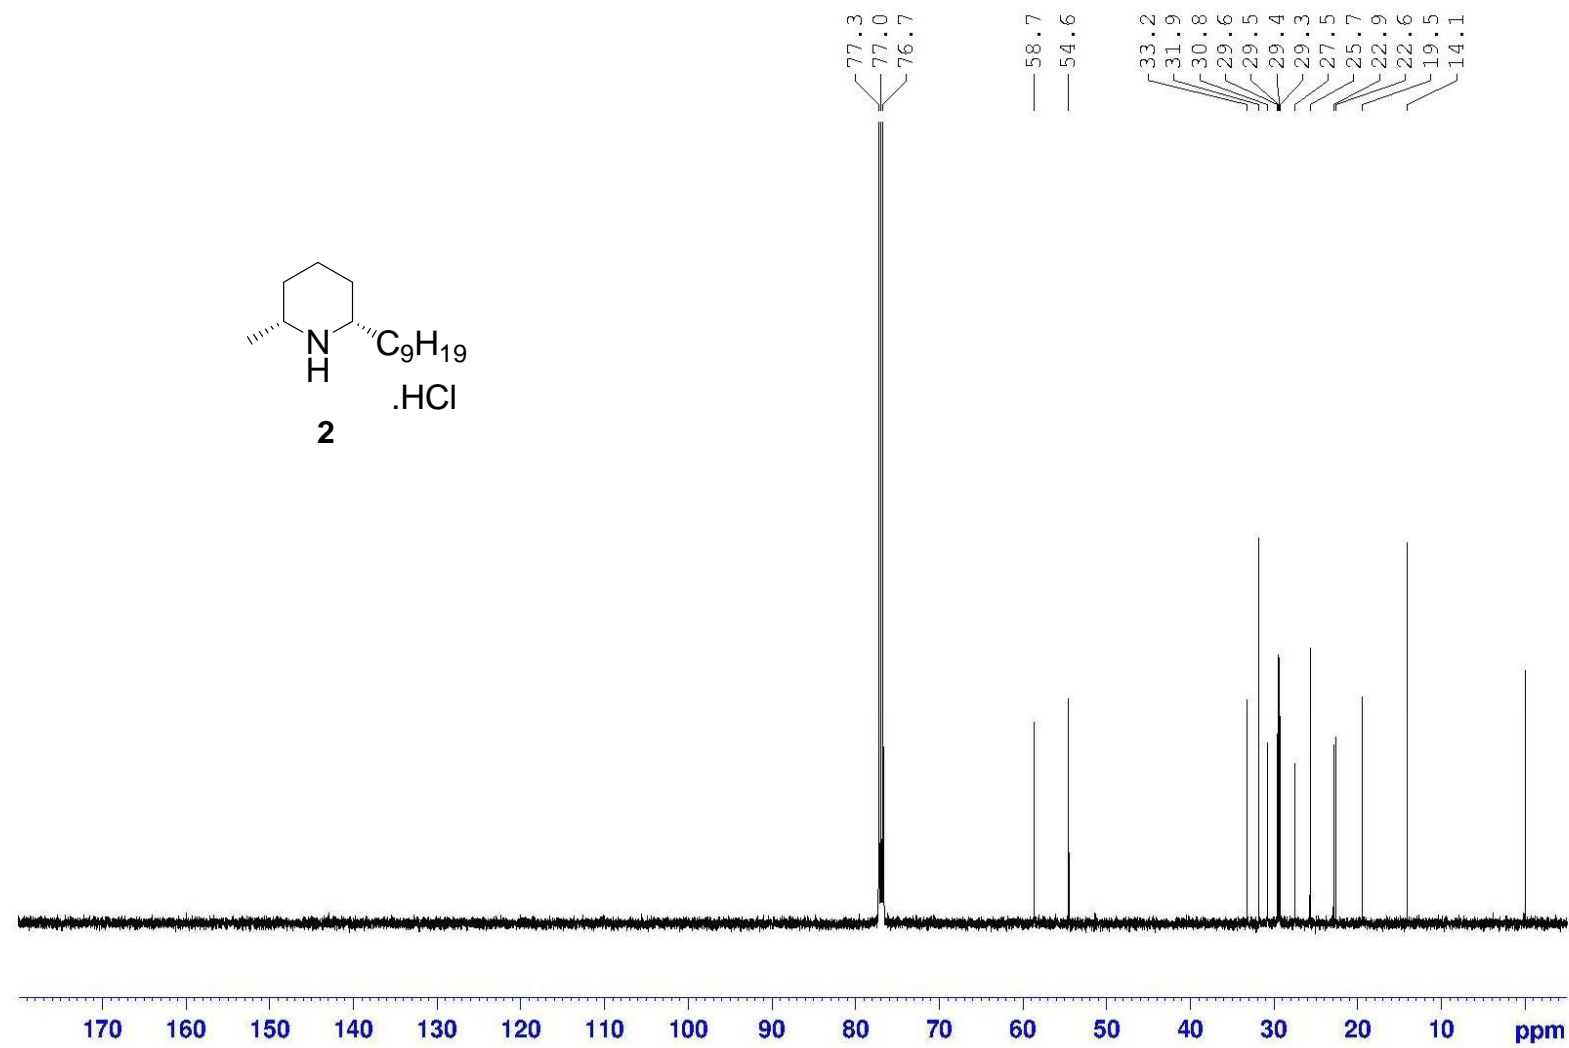

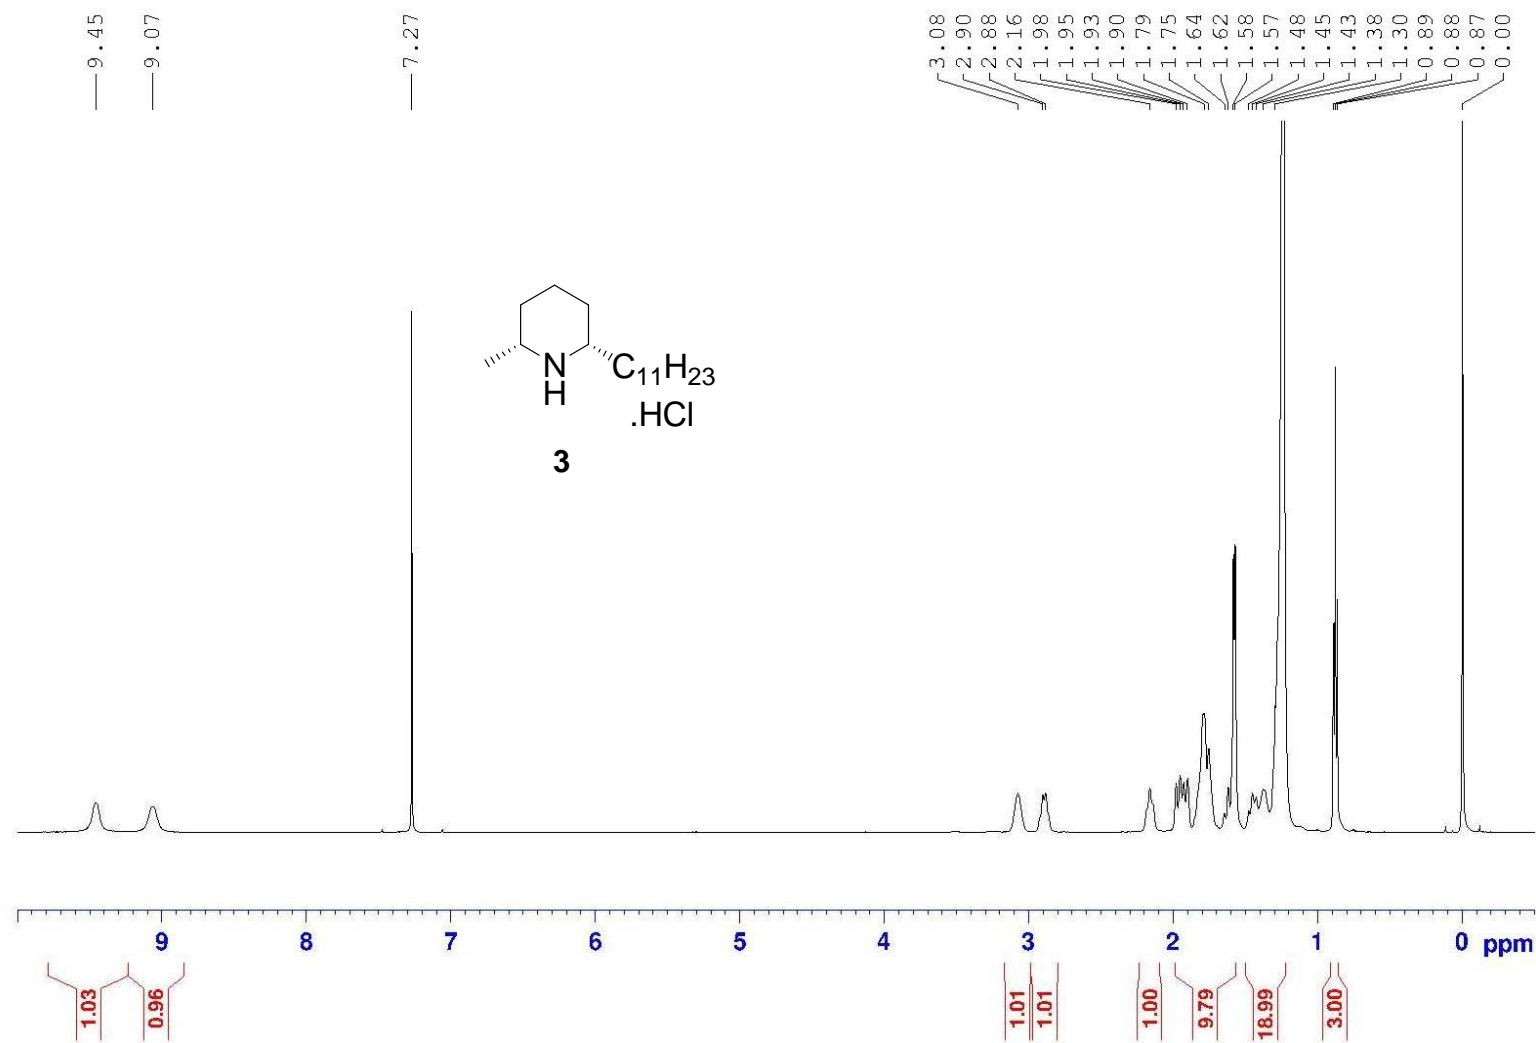

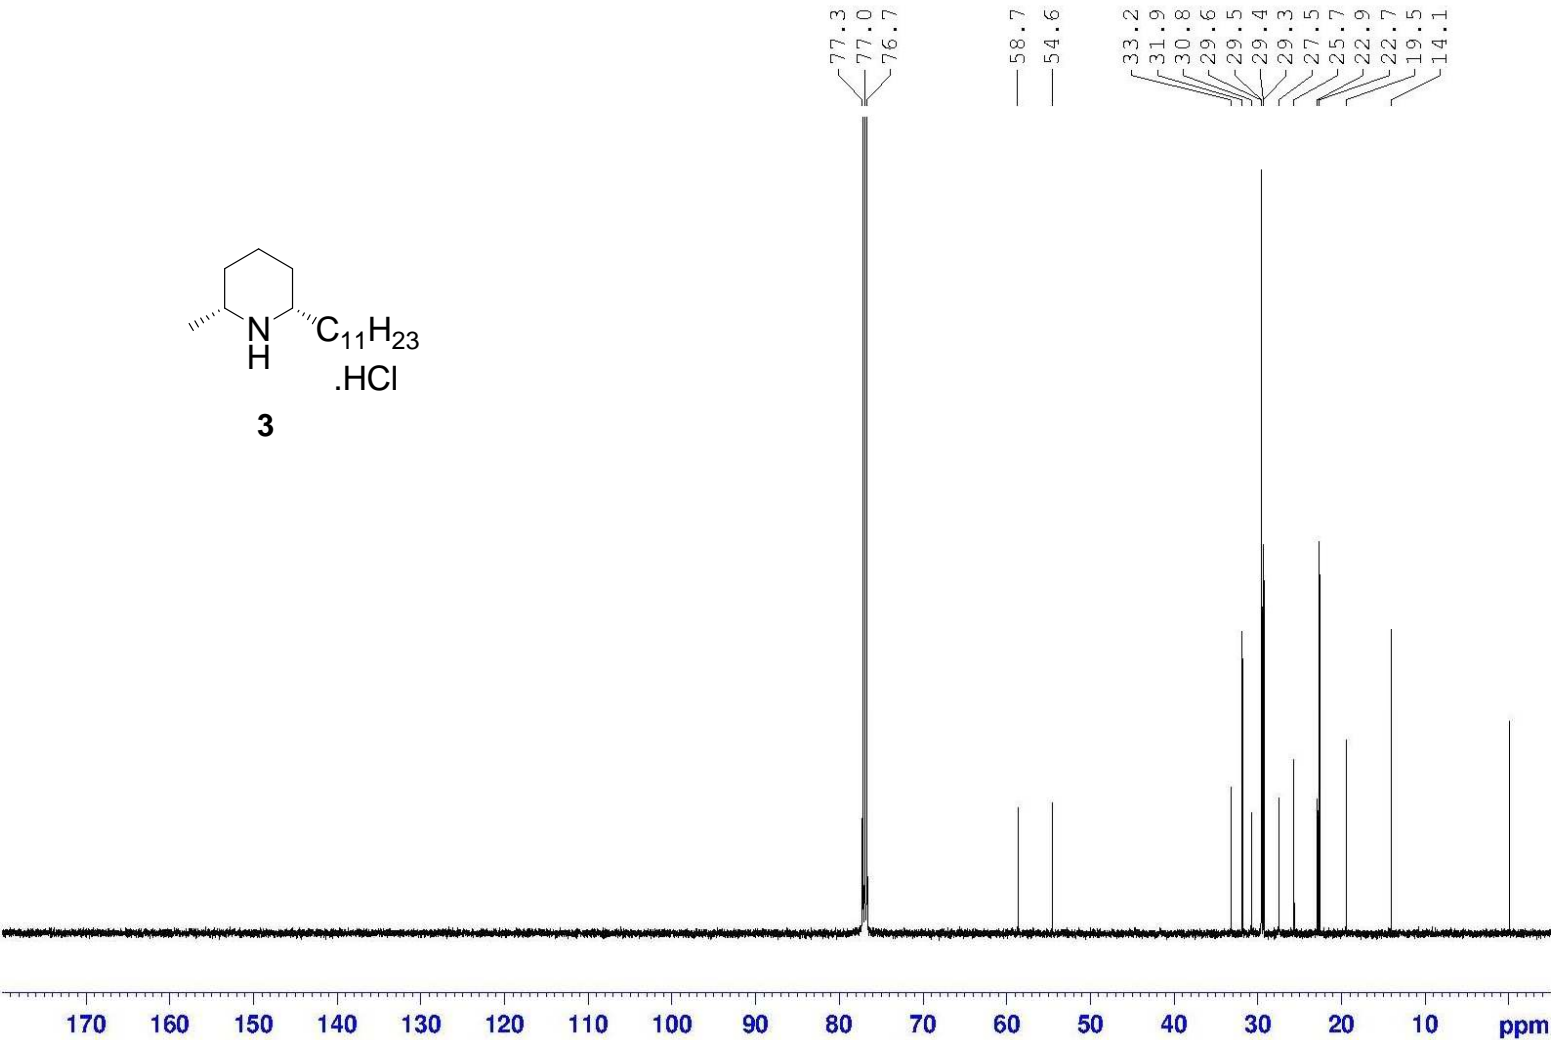

$^{13}\text{C}$  NMR spectroscopy confirms the existence of a single enantiomer by using (*S*)-(-)-*tert*-butylphenylphosphinothioic acid (-)-**A** as a chiral solvating agent<sup>15</sup>.

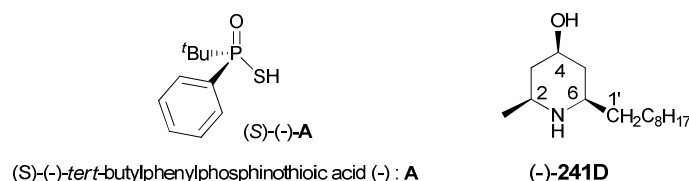

The  $^{13}\text{C}$  NMR spectra of (-)-241D, and its salt (-)-241D•(-)-**A** [44  $\mu\text{mol}$  of (-)-241D in the presence of 1.05 molar equivalent of (-)-**A**] were recorded in  $\text{CDCl}_3$ . (Table below)

**Table :**  $^{13}\text{C}$  NMR data for (-)-241D and (-)-241D•(-)-**A** in  $\text{CDCl}_3$ .

| $\text{N}^\circ$  | $\delta$ (-)-241D                               | $\delta$ (-)-241D•(-)- <b>A</b>                   |
|-------------------|-------------------------------------------------|---------------------------------------------------|
| <b>2</b>          | 50.2                                            | 51.5                                              |
| <b>3</b>          | 43.9                                            | 40.1                                              |
| <b>4</b>          | 69.4                                            | 66.7                                              |
| <b>5</b>          | 41.7                                            | 37.2                                              |
| <b>6</b>          | 54.8                                            | 55.8                                              |
| <b>C1'</b>        | 36.7                                            | 33                                                |
| <b>C2' to C8'</b> | 31.9 ; 29.7 ; 29.5 ;<br>29.5 ; 29.3 ; 26 ; 22.7 | 31.9 ; 29.5 ; 29.4 ;<br>29.2 ; 29.1 ; 25.5 ; 22.7 |
| <b>Me-C2</b>      | 22.4                                            | 19.1                                              |
| <b>C9'</b>        | 14.1                                            | 14.1                                              |

\* $\delta$  CSA (**A**): *t*-Bu group ( $\delta$ :25.1; 36.2,  $^1J_{\text{CP}} = 73.8$  Hz) and aromatics C ( $\delta$ :127.0;  $^2J_{\text{CP}} = 11.2$  Hz ; 129.8;  $^2J_{\text{CP}} = 2.1$  Hz; 132.7;  $^3J_{\text{CP}} = 9.3$  Hz; 137.9 ;  $^1J_{\text{CP}} = 90.7$  Hz)

A characteristic downfield shift is observed for the carbons  $\alpha$  to the nitrogen (C-2, C-6 ) and C-3, C-4 and C-5 ( $\beta$ -carbons) became shielded upon protonation of nitrogen (Spectrum page 34).

Then the  $^{13}\text{C}$  NMR spectrum of two samples of enantioenriched with (+)-241-D (8:2 er – Spectrum in red) and (6:4 er - Spectrum in green) were recorded in the presence of 1.05 equivalent of (-)-**A**. As shown in figure page 37, the magnetic nonequivalence was particularly visible for C6, C2, C3, C5 and C1'.

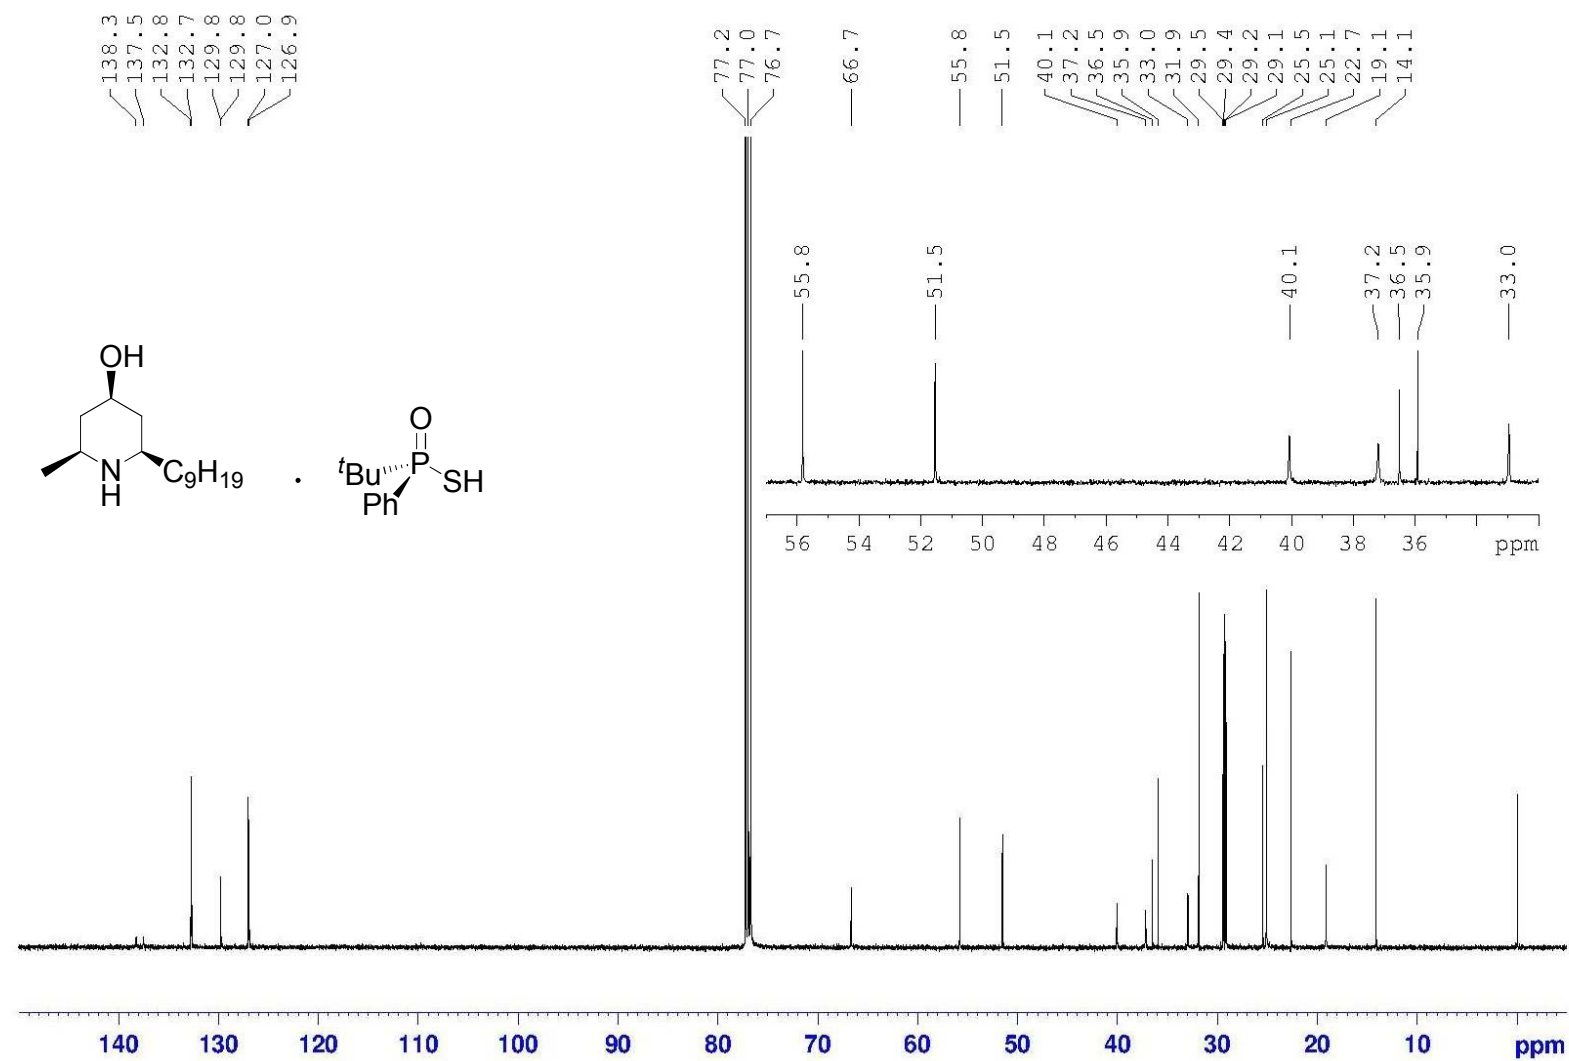

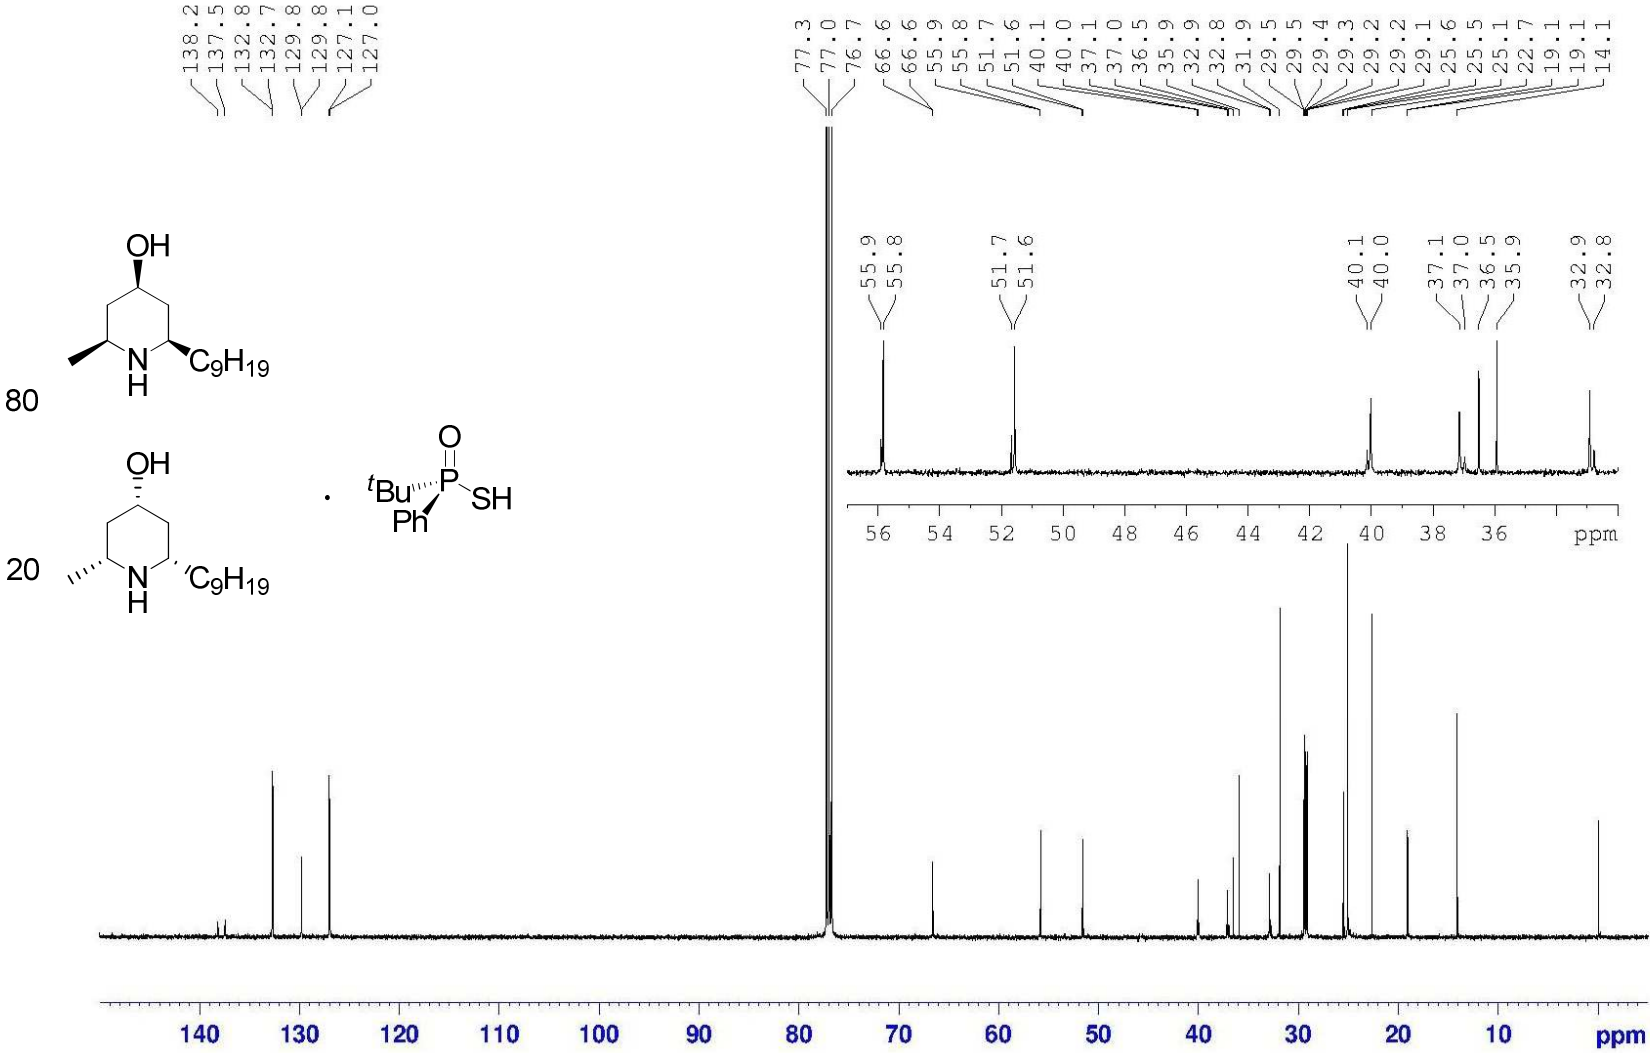

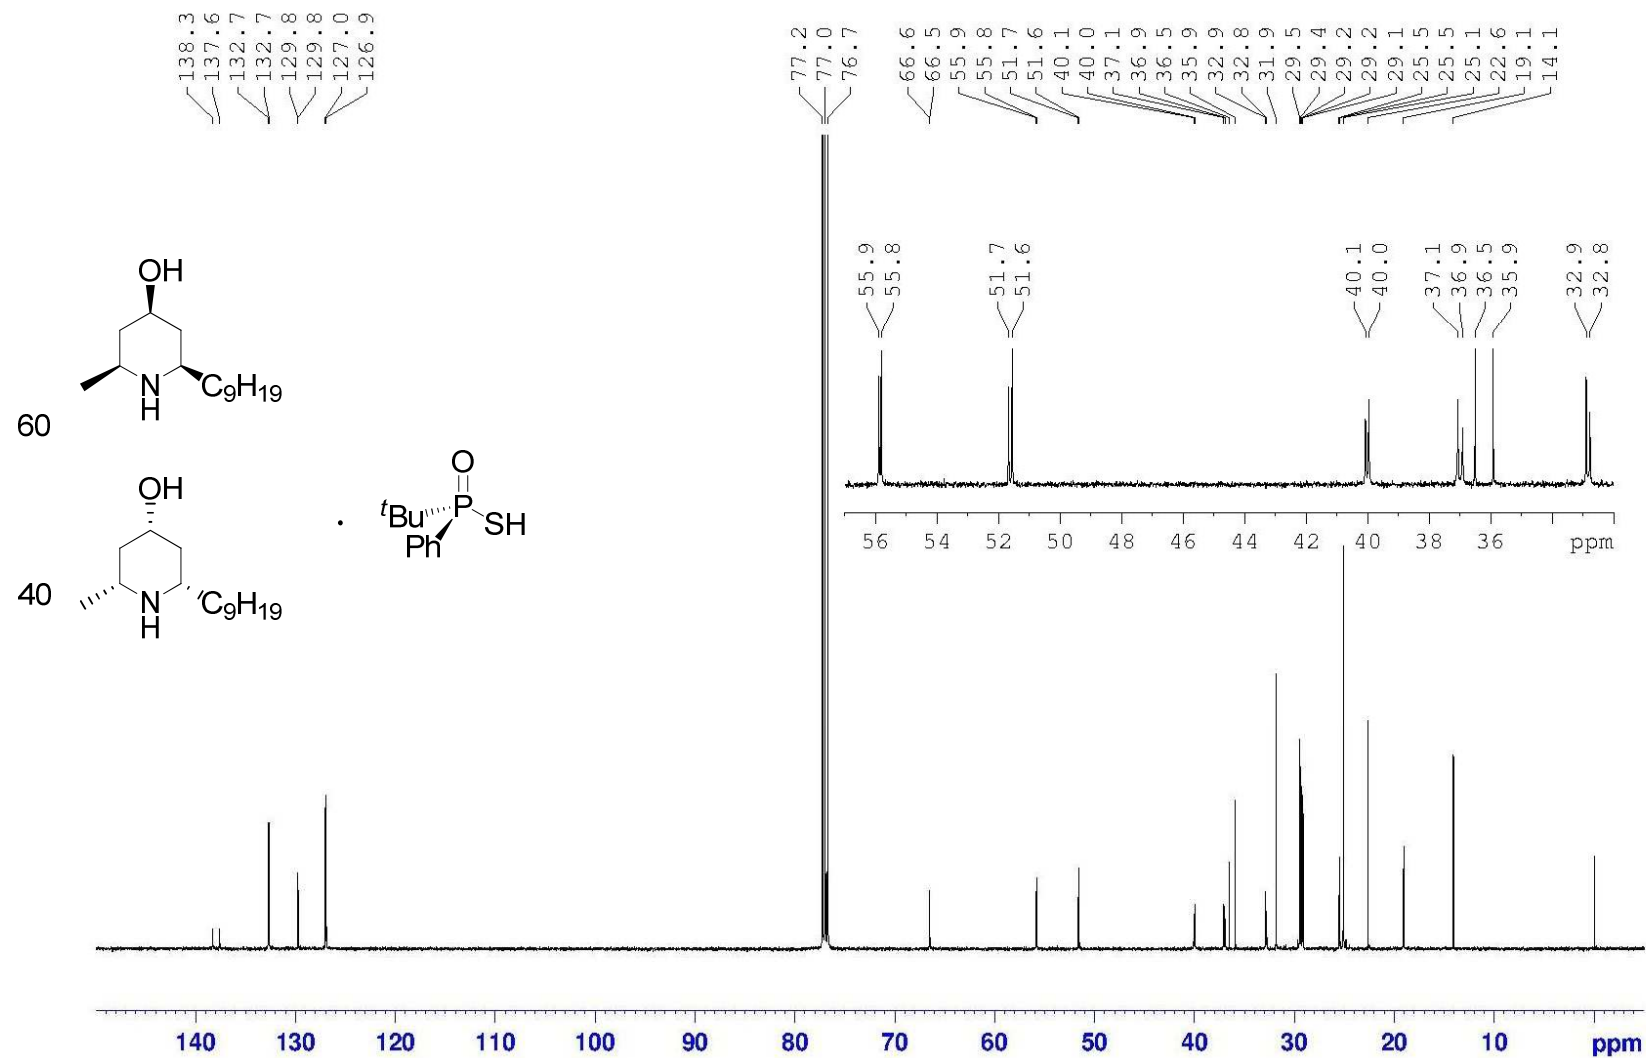

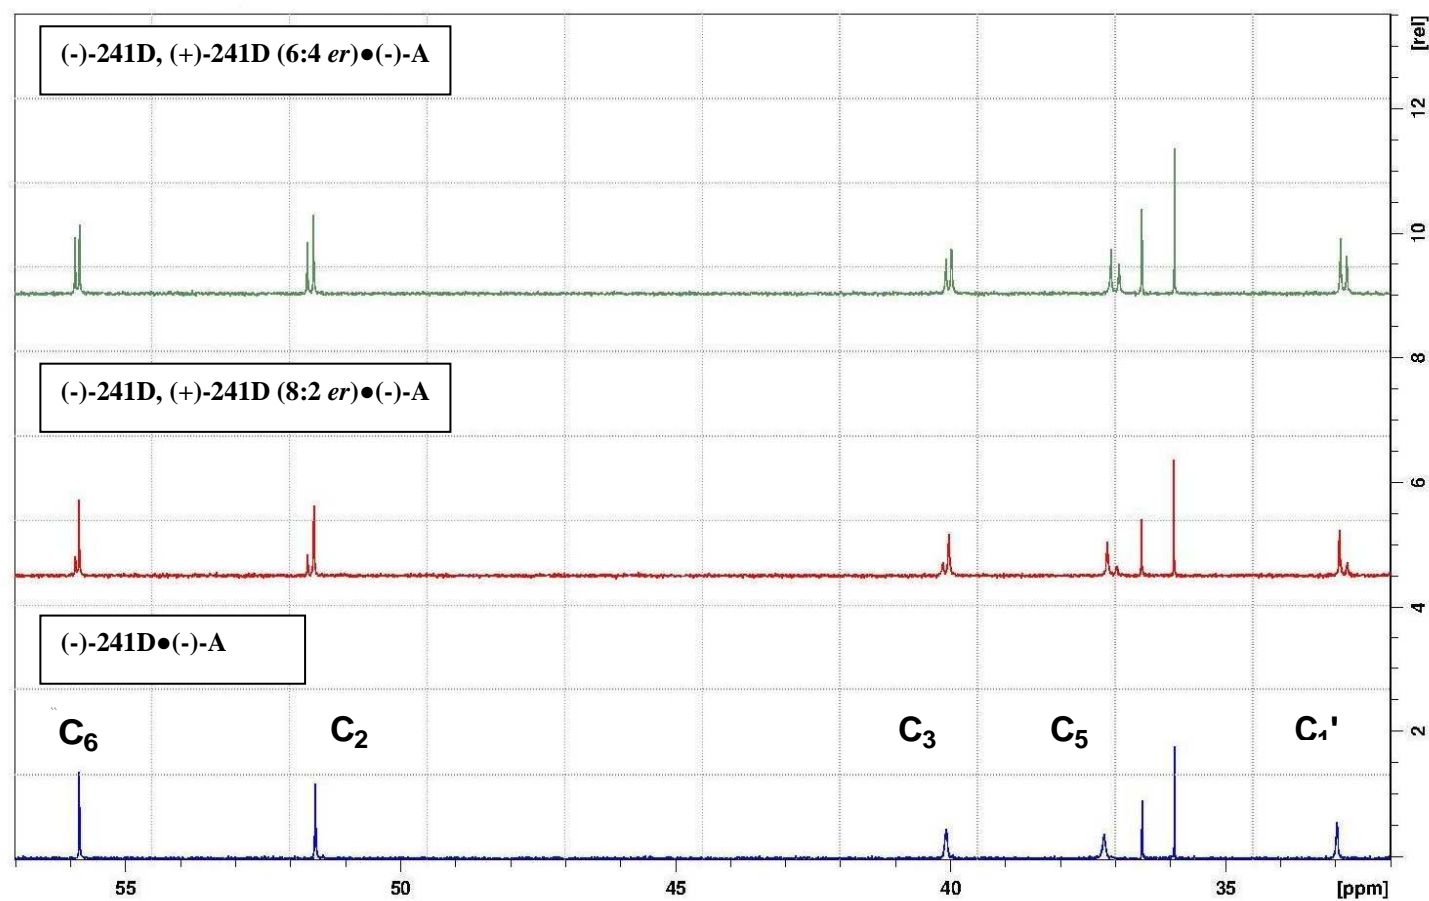

Supplement: c2ob25685a.pdf [file c2ob25685a.pdf]
